# Supplementary material for: Availability of health facilities and utilization of maternal and newborn postnatal care in rural Malawi
Source: PubMed Central journal article supplement (PMC6918704; doi:10.1186/s12884-019-2534-x), 2019-12-17
Supplement: 12884_2019_2534_MOESM2_ESM.pdf [file 12884_2019_2534_MOESM2_ESM.pdf]

List of variables:

/\*\*Set up\*\*/

DHSClust = clustering variable  
Weight = individual sampling weight  
del = place of delivery (0 for home delivery and 1 for facility delivery)  
del2 = place of delivery (1 for home delivery and 0 for facility delivery)  
v021 = primary sampling unit  
v022 = stratification used  
residence = urban/rural (1 for rural and 0 for urban)

/\*\*Outcomes\*\*/

binarympnc1 = maternal postnatal care within 1 day  
binarympnc7 = maternal postnatal care within 7 days  
binarypnc1 = newborn postnatal care within 1 day  
binarypnc7 = newborn postnatal care within 7 days

/\*\*Facility Indicators\*\*/

clinic5\_pnc = clinic-level facilities providing postnatal care within 5 km of household cluster  
hc5\_pnc = health centers providing postnatal care within 5 km of household cluster  
hosp5\_pnc = hospitals providing postnatal care within 5 km of household cluster  
clinic10\_pnc = clinic-level facilities providing postnatal care between 5 km and 10 km of household cluster  
hc10\_pnc = health centers providing postnatal care between 5 km and 10 km of household cluster  
hosp10\_pnc = hospitals providing postnatal care between 5 km and 10 km of household cluster  
clinic15\_pnc = clinic-level facilities providing postnatal care between 10 km and 15 km of household cluster  
hc15\_pnc = health centers providing postnatal care between 10 km and 15 km of household cluster  
hosp15\_pnc = hospitals providing postnatal care between 10 km and 15 km of household cluster

/\*\*Covariates\*\*/

religion = women's religion  
v024 = region of the country where women live  
seasons = seasons in which women gave birth  
tvradio = ownership of TV or radio  
moneyfortreat = cost of treatment being a perceived problem  
age = women's age  
education = women's education  
employment = women's employment  
wealthrural = rural-specific household wealth quintile  
birthnum = women's number of births  
nsize = newborn size  
nsex = newborn sex  
mhealthcheckb4 = maternal health checked before facility discharge (for facility births)  
newborncheckb4 = newborn health checked before facility discharge (for facility births)  
csect = receipt of cesarean section

```

. /*****
> GEE analyses: Full models
> *****/
.
. /*****
> Home
> Delivery
> Only
> *****/
.
. ***Analysis commands
. xtgee binarympnc1 clinic5_pnc hc5_pnc hosp5_pnc ///
> clinic10_pnc hc10_pnc hosp10_pnc ///
> clinic15_pnc hc15_pnc hosp15_pnc ///
> i.religion i.v024 i.seasons i.tvradio i.moneyfortreat i.age i.education i.employment
i.wealthrural ///
> i.birthnum ib3.nsize i.nsex [pweight=weight] if residence == 1 & del == 0,
family(binomial) link(logit) corr(exchange
> able)

```

```

Iteration 1: tolerance = .00140315
Iteration 2: tolerance = .00007196
Iteration 3: tolerance = 3.687e-06
Iteration 4: tolerance = 1.883e-07

```

```

GEE population-averaged model
Group variable:          DHSCLUST
Link:                   logit
Family:                 binomial
Correlation:           exchangeable

Number of obs          =          665
Number of groups       =          323
Obs per group:
    min =                1
    avg =                2.2
    max =                16
Wald chi2(33)         =          80.69
Prob > chi2           =          0.0000
Scale parameter:      1

```

(Std. Err. adjusted for clustering on DHSCLUST)

| binarympnc1        | Coef.     | Robust Std. Err. | z     | P> z  | [95% Conf. Interval] |          |
|--------------------|-----------|------------------|-------|-------|----------------------|----------|
| clinic5_pnc        | .470705   | .7125274         | 0.66  | 0.509 | -.925823             | 1.867233 |
| hc5_pnc            | .8026485  | .3099137         | 2.59  | 0.010 | .1952288             | 1.410068 |
| hosp5_pnc          | .2819961  | .4174005         | 0.68  | 0.499 | -.5360938            | 1.100086 |
| clinic10_pnc       | -.3242573 | .4094083         | -0.79 | 0.428 | -1.126683            | .4781682 |
| hc10_pnc           | .392781   | .3450009         | 1.14  | 0.255 | -.2834084            | 1.06897  |
| hosp10_pnc         | .6332002  | .3250175         | 1.95  | 0.051 | -.0038225            | 1.270223 |
| clinic15_pnc       | -.6287679 | .3753036         | -1.68 | 0.094 | -1.364349            | .1068136 |
| hc15_pnc           | -.118608  | .4239631         | -0.28 | 0.780 | -.9495605            | .7123445 |
| hosp15_pnc         | .2732141  | .3137124         | 0.87  | 0.384 | -.3416509            | .888079  |
| religion           |           |                  |       |       |                      |          |
| other christian    | .4941456  | .5300516         | 0.93  | 0.351 | -.5447364            | 1.533028 |
| muslim/no religion | .8285765  | .6046182         | 1.37  | 0.171 | -.3564533            | 2.013606 |
| v024               |           |                  |       |       |                      |          |
| central region     | -.55826   | .4864936         | -1.15 | 0.251 | -1.51177             | .3952499 |

|                   |           |          |       |       |           |           |
|-------------------|-----------|----------|-------|-------|-----------|-----------|
| southern region   | -.6414323 | .4718849 | -1.36 | 0.174 | -1.56631  | .2834452  |
| seasons           |           |          |       |       |           |           |
| winter-dry season | -1.332065 | .4525548 | -2.94 | 0.003 | -2.219056 | -.4450736 |
| hot-dry season    | -.3132541 | .4597731 | -0.68 | 0.496 | -1.214393 | .5878847  |
| 1.tvradio         | .7959497  | .301701  | 2.64  | 0.008 | .2046266  | 1.387273  |
| 1.moneyfortreat   | -.1840089 | .3102261 | -0.59 | 0.553 | -.7920409 | .424023   |
| age               |           |          |       |       |           |           |
| 25-34             | .2444646  | .4346326 | 0.56  | 0.574 | -.6073996 | 1.096329  |
| 35-49             | .1984492  | .6546376 | 0.30  | 0.762 | -1.084617 | 1.481515  |
| education         |           |          |       |       |           |           |
| primary           | .7201757  | .4817787 | 1.49  | 0.135 | -.2240933 | 1.664445  |
| secondary         | .0292842  | 1.066234 | 0.03  | 0.978 | -2.060497 | 2.119065  |
| 1.employment      | .8254441  | .3354727 | 2.46  | 0.014 | .1679298  | 1.482958  |
| wealthrural       |           |          |       |       |           |           |
| 2                 | -1.526517 | .5020796 | -3.04 | 0.002 | -2.510575 | -.542459  |
| 3                 | -.1963428 | .3349082 | -0.59 | 0.558 | -.8527508 | .4600653  |
| 4                 | -.8906297 | .4562048 | -1.95 | 0.051 | -1.784775 | .0035152  |
| 5                 | -1.688937 | .6698198 | -2.52 | 0.012 | -3.00176  | -.3761145 |
| birthnum          |           |          |       |       |           |           |
| 2-3               | -.8895553 | .6184754 | -1.44 | 0.150 | -2.101745 | .3226342  |
| 4+                | -.5621694 | .6920565 | -0.81 | 0.417 | -1.918575 | .7942364  |
| nsize             |           |          |       |       |           |           |
| 1                 | -1.121641 | .5508621 | -2.04 | 0.042 | -2.201311 | -.0419714 |
| 2                 | -.421961  | .3735788 | -1.13 | 0.259 | -1.154162 | .3102401  |
| 4                 | -1.22689  | .441614  | -2.78 | 0.005 | -2.092438 | -.3613426 |
| 5                 | -1.030602 | .9222433 | -1.12 | 0.264 | -2.838166 | .7769618  |
| nsex              |           |          |       |       |           |           |
| female            | .3729756  | .3610229 | 1.03  | 0.302 | -.3346163 | 1.080567  |
| _cons             | -1.916846 | .7593233 | -2.52 | 0.012 | -3.405092 | -.4285996 |

-----

. margins, dydx(\*)

Average marginal effects  
Model VCE : Robust

Number of obs = 665

Expression : Pr(binarympnc1 != 0), predict()

dy/dx w.r.t. : clinic5\_pnc hc5\_pnc hosp5\_pnc clinic10\_pnc hc10\_pnc hosp10\_pnc clinic15\_pnc  
hc15\_pnc hosp15\_pnc

2.religion 3.religion 2.v024 3.v024 2.seasons 3.seasons 1.tvradio

1.moneyfortreat 2.age 3.age

2.education 3.education 1.employment 2.wealthrural 3.wealthrural

4.wealthrural 5.wealthrural

2.birthnum 3.birthnum 1.nsize 2.nsize 4.nsize 5.nsize 1.nsex

-----

|                    | Delta-method |           |       |       | [95% Conf. Interval] |           |
|--------------------|--------------|-----------|-------|-------|----------------------|-----------|
|                    | dy/dx        | Std. Err. | z     | P> z  |                      |           |
| clinic5_pnc        | .0463535     | .0701009  | 0.66  | 0.508 | -.0910418            | .1837487  |
| hc5_pnc            | .0790422     | .0298772  | 2.65  | 0.008 | .0204839             | .1376005  |
| hosp5_pnc          | .02777       | .0409978  | 0.68  | 0.498 | -.0525841            | .1081242  |
| clinic10_pnc       | -.0319318    | .0398618  | -0.80 | 0.423 | -.1100594            | .0461958  |
| hc10_pnc           | .0386798     | .0340779  | 1.14  | 0.256 | -.0281117            | .1054713  |
| hosp10_pnc         | .0623555     | .0320228  | 1.95  | 0.052 | -.000408             | .1251189  |
| clinic15_pnc       | -.061919     | .0368261  | -1.68 | 0.093 | -.1340968            | .0102588  |
| hc15_pnc           | -.0116801    | .0417035  | -0.28 | 0.779 | -.0934174            | .0700572  |
| hosp15_pnc         | .0269052     | .0308744  | 0.87  | 0.384 | -.0336075            | .0874179  |
| religion           |              |           |       |       |                      |           |
| other christian    | .0424677     | .0407886  | 1.04  | 0.298 | -.0374765            | .1224118  |
| muslim/no religion | .078621      | .0548479  | 1.43  | 0.152 | -.028879             | .1861209  |
| v024               |              |           |       |       |                      |           |
| central region     | -.0631866    | .059939   | -1.05 | 0.292 | -.1806649            | .0542918  |
| southern region    | -.0711233    | .0578177  | -1.23 | 0.219 | -.1844438            | .0421973  |
| seasons            |              |           |       |       |                      |           |
| winter-dry season  | -.1121726    | .0334712  | -3.35 | 0.001 | -.1777749            | -.0465703 |
| hot-dry season     | -.0352254    | .0499601  | -0.71 | 0.481 | -.1331455            | .0626946  |
| 1.tvradio          | .0854463     | .034421   | 2.48  | 0.013 | .0179823             | .1529102  |
| 1.moneyfortreat    | -.0183546    | .031387   | -0.58 | 0.559 | -.0798719            | .0431627  |
| age                |              |           |       |       |                      |           |
| 25-34              | .0235988     | .0407565  | 0.58  | 0.563 | -.0562825            | .1034801  |
| 35-49              | .0189112     | .0623361  | 0.30  | 0.762 | -.1032654            | .1410878  |
| education          |              |           |       |       |                      |           |
| primary            | .0812092     | .0602208  | 1.35  | 0.177 | -.0368215            | .1992398  |
| secondary          | .0027447     | .1007305  | 0.03  | 0.978 | -.1946834            | .2001729  |
| 1.employment       | .0732765     | .0269904  | 2.71  | 0.007 | .0203762             | .1261768  |
| wealthrural        |              |           |       |       |                      |           |
| 2                  | -.1384912    | .0438232  | -3.16 | 0.002 | -.224383             | -.0525993 |
| 3                  | -.0251305    | .0428283  | -0.59 | 0.557 | -.1090725            | .0588115  |
| 4                  | -.0958224    | .0479024  | -2.00 | 0.045 | -.1897094            | -.0019355 |
| 5                  | -.1466126    | .0477798  | -3.07 | 0.002 | -.2402592            | -.0529659 |
| birthnum           |              |           |       |       |                      |           |
| 2-3                | -.0949707    | .0757243  | -1.25 | 0.210 | -.2433877            | .0534462  |
| 4+                 | -.065181     | .0856991  | -0.76 | 0.447 | -.2331483            | .1027862  |
| nsize              |              |           |       |       |                      |           |
| 1                  | -.1030533    | .0401706  | -2.57 | 0.010 | -.1817863            | -.0243204 |
| 2                  | -.0470461    | .0394563  | -1.19 | 0.233 | -.1243791            | .0302869  |
| 4                  | -.1093896    | .0333361  | -3.28 | 0.001 | -.1747271            | -.0440521 |
| 5                  | -.0971686    | .0668124  | -1.45 | 0.146 | -.2281185            | .0337813  |
| nsex               |              |           |       |       |                      |           |

female | .0365905 .0355701 1.03 0.304 -.0331256 .1063065

Note: dy/dx for factor levels is the discrete change from the base level.

```
.
. xtgee binarympnc7 clinic5_pnc hc5_pnc hosp5_pnc ///
> clinic10_pnc hc10_pnc hosp10_pnc ///
> clinic15_pnc hc15_pnc hosp15_pnc ///
> i.religion i.v024 i.seasons i.tvradio i.moneyfortreat i.age i.education i.employment
i.wealthrural ///
> i.birthnum ib3.nsize i.nsex [pweight=weight] if residence == 1 & del == 0,
family(binomial) link(logit) corr(exchange
> able)
```

Iteration 1: tolerance = .02825241  
Iteration 2: tolerance = .00101973  
Iteration 3: tolerance = .0000304  
Iteration 4: tolerance = 7.726e-07

GEE population-averaged model  
Group variable: DHSClust  
Link: logit  
Family: binomial  
Correlation: exchangeable  
Number of obs = 665  
Number of groups = 323  
Obs per group: min = 1, avg = 2.2, max = 16  
Wald chi2(33) = 64.42  
Prob > chi2 = 0.0009  
Scale parameter: 1

(Std. Err. adjusted for clustering on DHSClust)

| binarympnc7        | Coef.     | Robust Std. Err. | z     | P> z  | [95% Conf. Interval] |           |
|--------------------|-----------|------------------|-------|-------|----------------------|-----------|
| clinic5_pnc        | 1.00931   | .5667593         | 1.78  | 0.075 | -.1015178            | 2.120138  |
| hc5_pnc            | .5973067  | .2608474         | 2.29  | 0.022 | .0860553             | 1.108558  |
| hosp5_pnc          | -.0202632 | .3515284         | -0.06 | 0.954 | -.7092462            | .6687198  |
| clinic10_pnc       | -.0267117 | .3020294         | -0.09 | 0.930 | -.6186784            | .565255   |
| hc10_pnc           | .2263657  | .2656361         | 0.85  | 0.394 | -.2942715            | .7470029  |
| hosp10_pnc         | .5949827  | .2624962         | 2.27  | 0.023 | .0804996             | 1.109466  |
| clinic15_pnc       | -.6014747 | .320047          | -1.88 | 0.060 | -1.228755            | .0258058  |
| hc15_pnc           | -.2869005 | .3500907         | -0.82 | 0.412 | -.9730657            | .3992646  |
| hosp15_pnc         | .2040824  | .2774849         | 0.74  | 0.462 | -.339778             | .7479429  |
| religion           |           |                  |       |       |                      |           |
| other christian    | .3825093  | .4474062         | 0.85  | 0.393 | -.4943907            | 1.259409  |
| muslim/no religion | .5234823  | .5112457         | 1.02  | 0.306 | -.4785409            | 1.525506  |
| v024               |           |                  |       |       |                      |           |
| central region     | -.1953452 | .3933448         | -0.50 | 0.619 | -.9662869            | .5755965  |
| southern region    | -.3563546 | .3924408         | -0.91 | 0.364 | -1.125524            | .4128152  |
| seasons            |           |                  |       |       |                      |           |
| winter-dry season  | -.8471269 | .3700681         | -2.29 | 0.022 | -1.572447            | -.1218067 |
| hot-dry season     | -.2109849 | .4248897         | -0.50 | 0.619 | -1.043753            | .6217836  |



|                    |           |          |       |       |           |           |
|--------------------|-----------|----------|-------|-------|-----------|-----------|
| clinic10_pnc       | -.0032782 | .0370634 | -0.09 | 0.930 | -.075921  | .0693647  |
| hc10_pnc           | .0277807  | .0329104 | 0.84  | 0.399 | -.0367224 | .0922838  |
| hosp10_pnc         | .0730192  | .0313325 | 2.33  | 0.020 | .0116087  | .1344297  |
| clinic15_pnc       | -.0738159 | .0389578 | -1.89 | 0.058 | -.1501718 | .0025399  |
| hc15_pnc           | -.0352098 | .042893  | -0.82 | 0.412 | -.1192786 | .0488589  |
| hosp15_pnc         | .025046   | .0340059 | 0.74  | 0.461 | -.0416043 | .0916963  |
| religion           |           |          |       |       |           |           |
| other christian    | .0428055  | .0460461 | 0.93  | 0.353 | -.0474432 | .1330542  |
| muslim/no religion | .0610335  | .0573495 | 1.06  | 0.287 | -.0513695 | .1734365  |
| v024               |           |          |       |       |           |           |
| central region     | -.0258924 | .0535342 | -0.48 | 0.629 | -.1308175 | .0790326  |
| southern region    | -.045293  | .0523167 | -0.87 | 0.387 | -.1478319 | .0572459  |
| seasons            |           |          |       |       |           |           |
| winter-dry season  | -.0950454 | .0395805 | -2.40 | 0.016 | -.1726217 | -.0174691 |
| hot-dry season     | -.0282237 | .0555823 | -0.51 | 0.612 | -.1371631 | .0807156  |
| 1.tvradio          | .0647045  | .0386997 | 1.67  | 0.095 | -.0111456 | .1405545  |
| 1.moneyfortreat    | -.0015382 | .0358966 | -0.04 | 0.966 | -.0718942 | .0688179  |
| age                |           |          |       |       |           |           |
| 25-34              | -.0330957 | .0572277 | -0.58 | 0.563 | -.14526   | .0790686  |
| 35-49              | -.0245868 | .0826045 | -0.30 | 0.766 | -.1864887 | .1373151  |
| education          |           |          |       |       |           |           |
| primary            | .1325103  | .0745811 | 1.78  | 0.076 | -.0136659 | .2786866  |
| secondary          | -.021331  | .1092472 | -0.20 | 0.845 | -.2354515 | .1927895  |
| 1.employment       | .0760247  | .0292971 | 2.59  | 0.009 | .0186034  | .1334459  |
| wealthrural        |           |          |       |       |           |           |
| 2                  | -.1289874 | .0533877 | -2.42 | 0.016 | -.2336254 | -.0243494 |
| 3                  | -.0302212 | .0461369 | -0.66 | 0.512 | -.1206479 | .0602055  |
| 4                  | -.0615384 | .0633975 | -0.97 | 0.332 | -.1857953 | .0627184  |
| 5                  | -.1483542 | .0562482 | -2.64 | 0.008 | -.2585985 | -.0381098 |
| birthnum           |           |          |       |       |           |           |
| 2-3                | -.1118726 | .0755113 | -1.48 | 0.138 | -.2598719 | .0361268  |
| 4+                 | -.0716714 | .0932664 | -0.77 | 0.442 | -.2544701 | .1111273  |
| nsize              |           |          |       |       |           |           |
| 1                  | .0011801  | .0738603 | 0.02  | 0.987 | -.1435835 | .1459436  |
| 2                  | -.0161292 | .0452948 | -0.36 | 0.722 | -.1049053 | .072647   |
| 4                  | -.0668912 | .0430646 | -1.55 | 0.120 | -.1512961 | .0175138  |
| 5                  | -.0862153 | .0708071 | -1.22 | 0.223 | -.2249946 | .052564   |
| nsex               |           |          |       |       |           |           |
| female             | .0562366  | .0421036 | 1.34  | 0.182 | -.0262849 | .1387581  |

Note: dy/dx for factor levels is the discrete change from the base level.

. xtgee binarypnc1 clinic5\_pnc hc5\_pnc hosp5\_pnc ///

```

> clinic10_pnc hc10_pnc hosp10_pnc ///
> clinic15_pnc hc15_pnc hosp15_pnc ///
> i.religion i.v024 i.seasons i.tvradio i.moneyfortreat i.age i.education i.employment
i.wealthrural ///
> i.birthnum ib3.nsize i.nsex [pweight=weight] if residence == 1 & del == 0,
family(binomial) link(logit) corr(exchange
> able)

```

```

Iteration 1: tolerance = .00339711
Iteration 2: tolerance = .00033524
Iteration 3: tolerance = .00003309
Iteration 4: tolerance = 3.287e-06
Iteration 5: tolerance = 3.264e-07

```

```

GEE population-averaged model
Group variable:          DHSCLUST      Number of obs   =       664
Link:                   logit          Number of groups =       323
Family:                 binomial       Obs per group:
Correlation:            exchangeable   min =           1
                                                avg =           2.2
                                                max =           16
                                                Wald chi2(33)  =       52.42
Scale parameter:        1              Prob > chi2     =       0.0172

```

(Std. Err. adjusted for clustering on DHSCLUST)

| binarypnc1         | Coef.     | Robust Std. Err. | z     | P> z  | [95% Conf. Interval] |           |
|--------------------|-----------|------------------|-------|-------|----------------------|-----------|
| clinic5_pnc        | -.3299759 | .6804758         | -0.48 | 0.628 | -1.663684            | 1.003732  |
| hc5_pnc            | .6330333  | .309911          | 2.04  | 0.041 | .025619              | 1.240448  |
| hosp5_pnc          | 1.281857  | .5954893         | 2.15  | 0.031 | .1147196             | 2.448995  |
| clinic10_pnc       | .2811966  | .3035996         | 0.93  | 0.354 | -.3138476            | .8762408  |
| hc10_pnc           | .2585695  | .3384186         | 0.76  | 0.445 | -.4047187            | .9218577  |
| hosp10_pnc         | .279462   | .2854076         | 0.98  | 0.327 | -.2799266            | .8388507  |
| clinic15_pnc       | -.0797706 | .3282192         | -0.24 | 0.808 | -.7230683            | .5635271  |
| hc15_pnc           | .463424   | .4176652         | 1.11  | 0.267 | -.3551847            | 1.282033  |
| hosp15_pnc         | -.0004361 | .2815351         | -0.00 | 0.999 | -.5522348            | .5513626  |
| religion           |           |                  |       |       |                      |           |
| other christian    | .3412232  | .4220518         | 0.81  | 0.419 | -.4859831            | 1.16843   |
| muslim/no religion | .6752065  | .5341529         | 1.26  | 0.206 | -.371714             | 1.722127  |
| v024               |           |                  |       |       |                      |           |
| central region     | -.8252024 | .4463231         | -1.85 | 0.064 | -1.69998             | .0495747  |
| southern region    | -1.459214 | .5446553         | -2.68 | 0.007 | -2.526719            | -.3917089 |
| seasons            |           |                  |       |       |                      |           |
| winter-dry season  | -.5327801 | .3652164         | -1.46 | 0.145 | -1.248591            | .1830308  |
| hot-dry season     | -.0198342 | .3606663         | -0.05 | 0.956 | -.7267272            | .6870587  |
| 1.tvradio          | .321764   | .2791411         | 1.15  | 0.249 | -.2253426            | .8688706  |
| 1.moneyfortreat    | .1988449  | .2973275         | 0.67  | 0.504 | -.3839063            | .7815961  |
| age                |           |                  |       |       |                      |           |
| 25-34              | .971951   | .4051647         | 2.40  | 0.016 | .1778428             | 1.766059  |





|                    |           |          |       |       |           |           |
|--------------------|-----------|----------|-------|-------|-----------|-----------|
| hosp15_pnc         | -.0000467 | .0301222 | -0.00 | 0.999 | -.0590851 | .0589918  |
| religion           |           |          |       |       |           |           |
| other christian    | .0328173  | .0378534 | 0.87  | 0.386 | -.041374  | .1070086  |
| muslim/no religion | .0719507  | .0578304 | 1.24  | 0.213 | -.0413948 | .1852962  |
| v024               |           |          |       |       |           |           |
| central region     | -.1192778 | .072196  | -1.65 | 0.099 | -.2607794 | .0222238  |
| southern region    | -.1807753 | .0769364 | -2.35 | 0.019 | -.3315678 | -.0299828 |
| seasons            |           |          |       |       |           |           |
| winter-dry season  | -.0527982 | .0345377 | -1.53 | 0.126 | -.1204909 | .0148946  |
| hot-dry season     | -.0022862 | .0414547 | -0.06 | 0.956 | -.0835358 | .0789635  |
| 1.tvradio          | .0353297  | .0316582 | 1.12  | 0.264 | -.0267191 | .0973785  |
| 1.moneyfortreat    | .0210317  | .0313283 | 0.67  | 0.502 | -.0403707 | .082434   |
| age                |           |          |       |       |           |           |
| 25-34              | .0980925  | .0377533 | 2.60  | 0.009 | .0240973  | .1720877  |
| 35-49              | .0602945  | .0558421 | 1.08  | 0.280 | -.0491541 | .1697431  |
| education          |           |          |       |       |           |           |
| primary            | -.0172492 | .0364992 | -0.47 | 0.637 | -.0887862 | .0542879  |
| secondary          | -.0976417 | .0522117 | -1.87 | 0.061 | -.1999747 | .0046914  |
| 1.employment       | .0571247  | .0275996 | 2.07  | 0.038 | .0030305  | .1112189  |
| wealthrural        |           |          |       |       |           |           |
| 2                  | .0768889  | .0417739 | 1.84  | 0.066 | -.0049863 | .1587642  |
| 3                  | .1015186  | .0469477 | 2.16  | 0.031 | .0095028  | .1935344  |
| 4                  | .0635574  | .0459539 | 1.38  | 0.167 | -.0265105 | .1536253  |
| 5                  | .0762834  | .0502049 | 1.52  | 0.129 | -.0221165 | .1746832  |
| birthnum           |           |          |       |       |           |           |
| 2-3                | -.1288339 | .0846712 | -1.52 | 0.128 | -.2947864 | .0371186  |
| 4+                 | -.1742369 | .100202  | -1.74 | 0.082 | -.3706293 | .0221554  |
| nsize              |           |          |       |       |           |           |
| 1                  | .0909331  | .0662216 | 1.37  | 0.170 | -.0388588 | .2207251  |
| 2                  | .0319564  | .0363939 | 0.88  | 0.380 | -.0393742 | .1032871  |
| 4                  | -.0416719 | .034184  | -1.22 | 0.223 | -.1086713 | .0253275  |
| 5                  | -.0836829 | .0401763 | -2.08 | 0.037 | -.162427  | -.0049388 |
| nsex               |           |          |       |       |           |           |
| female             | .0003161  | .0343889 | 0.01  | 0.993 | -.0670849 | .067717   |

-----  
Note: dy/dx for factor levels is the discrete change from the base level.

```

.
. xtgee binarypnc7 clinic5_pnc hc5_pnc hosp5_pnc ///
> clinic10_pnc hc10_pnc hosp10_pnc ///
> clinic15_pnc hc15_pnc hosp15_pnc ///
> i.religion i.v024 i.seasons i.tvradio i.moneyfortreat i.age i.education i.employment
i.wealthrural ///
> i.birthnum ib3.nsize i.nsex [pweight=weight] if residence == 1 & del == 0,

```

```
family(binomial) link(logit) corr(exchangeable)
> able)
```

```
Iteration 1: tolerance = .02097978
Iteration 2: tolerance = .00321883
Iteration 3: tolerance = .00051196
Iteration 4: tolerance = .00007985
Iteration 5: tolerance = .00001242
Iteration 6: tolerance = 1.932e-06
Iteration 7: tolerance = 3.004e-07
```

```
GEE population-averaged model
Group variable:          DHSCLUST
Link:                    logit
Family:                  binomial
Correlation:             exchangeable

Number of obs          =          664
Number of groups       =          323
Obs per group:
    min =                1
    avg  =                2.2
    max =               16

Wald chi2(33)          =          31.48
Prob > chi2            =          0.5428

Scale parameter:       1
```

(Std. Err. adjusted for clustering on DHSCLUST)

| binarypnc7         | Coef.     | Robust Std. Err. | z     | P> z  | [95% Conf. Interval] |          |
|--------------------|-----------|------------------|-------|-------|----------------------|----------|
| clinic5_pnc        | .232669   | .508231          | 0.46  | 0.647 | -.7634455            | 1.228783 |
| hc5_pnc            | .3502889  | .2356009         | 1.49  | 0.137 | -.1114804            | .8120581 |
| hosp5_pnc          | .6490876  | .4827631         | 1.34  | 0.179 | -.2971106            | 1.595286 |
| clinic10_pnc       | .2030623  | .2296658         | 0.88  | 0.377 | -.2470744            | .653199  |
| hc10_pnc           | .2278533  | .2237012         | 1.02  | 0.308 | -.210593             | .6662997 |
| hosp10_pnc         | .3677732  | .233187          | 1.58  | 0.115 | -.0892649            | .8248112 |
| clinic15_pnc       | .0316646  | .2468305         | 0.13  | 0.898 | -.4521144            | .5154435 |
| hc15_pnc           | -.113329  | .2914793         | -0.39 | 0.697 | -.684618             | .4579599 |
| hosp15_pnc         | .0471521  | .2275592         | 0.21  | 0.836 | -.3988557            | .4931599 |
| religion           |           |                  |       |       |                      |          |
| other christian    | .0547708  | .3181011         | 0.17  | 0.863 | -.5686959            | .6782374 |
| muslim/no religion | -.0534644 | .4191666         | -0.13 | 0.899 | -.8750158            | .7680871 |
| v024               |           |                  |       |       |                      |          |
| central region     | -.2863002 | .3424688         | -0.84 | 0.403 | -.9575268            | .3849263 |
| southern region    | -.5566088 | .3511414         | -1.59 | 0.113 | -1.244833            | .1316156 |
| seasons            |           |                  |       |       |                      |          |
| winter-dry season  | -.2155004 | .3129236         | -0.69 | 0.491 | -.8288194            | .3978187 |
| hot-dry season     | -.2865772 | .2899591         | -0.99 | 0.323 | -.8548867            | .2817322 |
| 1.tvradio          | .0582351  | .2361008         | 0.25  | 0.805 | -.4045138            | .5209841 |
| 1.moneyfortreat    | .2234051  | .2219423         | 1.01  | 0.314 | -.2115937            | .658404  |
| age                |           |                  |       |       |                      |          |
| 25-34              | .3628272  | .3537478         | 1.03  | 0.305 | -.3305057            | 1.05616  |
| 35-49              | .2912182  | .4216819         | 0.69  | 0.490 | -.5352632            | 1.1177   |
| education          |           |                  |       |       |                      |          |



|                    |           |          |       |       |           |           |
|--------------------|-----------|----------|-------|-------|-----------|-----------|
| other christian    | .0098707  | .0568038 | 0.17  | 0.862 | -.1014627 | .1212042  |
| muslim/no religion | -.009406  | .0737523 | -0.13 | 0.899 | -.1539577 | .1351458  |
| v024               |           |          |       |       |           |           |
| central region     | -.0565169 | .0697171 | -0.81 | 0.418 | -.1931599 | .0801261  |
| southern region    | -.1041441 | .0695006 | -1.50 | 0.134 | -.2403628 | .0320746  |
| seasons            |           |          |       |       |           |           |
| winter-dry season  | -.0389777 | .055891  | -0.70 | 0.486 | -.148522  | .0705667  |
| hot-dry season     | -.0510192 | .0499068 | -1.02 | 0.307 | -.1488348 | .0467964  |
| 1.tvradio          |           |          |       |       |           |           |
| 1.moneyfortreat    | .0105505  | .0430196 | 0.25  | 0.806 | -.0737663 | .0948674  |
|                    | .0398575  | .0394541 | 1.01  | 0.312 | -.0374711 | .1171861  |
| age                |           |          |       |       |           |           |
| 25-34              | .0640403  | .0611159 | 1.05  | 0.295 | -.0557446 | .1838252  |
| 35-49              | .0505855  | .0731854 | 0.69  | 0.489 | -.0928553 | .1940263  |
| education          |           |          |       |       |           |           |
| primary            | .0100748  | .0626735 | 0.16  | 0.872 | -.1127631 | .1329127  |
| secondary          | -.1776585 | .069005  | -2.57 | 0.010 | -.3129059 | -.0424111 |
| 1.employment       |           |          |       |       |           |           |
|                    | .0426836  | .0446857 | 0.96  | 0.339 | -.0448987 | .130266   |
| wealthrural        |           |          |       |       |           |           |
| 2                  | .1211664  | .055411  | 2.19  | 0.029 | .0125629  | .22977    |
| 3                  | .1187122  | .0606635 | 1.96  | 0.050 | -.0001861 | .2376105  |
| 4                  | .1111784  | .06073   | 1.83  | 0.067 | -.0078502 | .230207   |
| 5                  | .0622487  | .0684669 | 0.91  | 0.363 | -.071944  | .1964413  |
| birthnum           |           |          |       |       |           |           |
| 2-3                | -.0806557 | .0873229 | -0.92 | 0.356 | -.2518055 | .0904941  |
| 4+                 | -.1376385 | .103295  | -1.33 | 0.183 | -.340093  | .0648161  |
| nsize              |           |          |       |       |           |           |
| 1                  | .1333436  | .0872649 | 1.53  | 0.127 | -.0376924 | .3043796  |
| 2                  | .0168114  | .0445729 | 0.38  | 0.706 | -.0705498 | .1041727  |
| 4                  | .0151176  | .0551965 | 0.27  | 0.784 | -.0930655 | .1233007  |
| 5                  | .015469   | .1029773 | 0.15  | 0.881 | -.1863629 | .2173008  |
| nsex               |           |          |       |       |           |           |
| female             | .0265077  | .0461498 | 0.57  | 0.566 | -.0639442 | .1169595  |

-----  
Note: dy/dx for factor levels is the discrete change from the base level.

```

.
. /*****
> Facility
> Delivery
> Only
> *****/
.
. ***Analysis commands
. xtgee specialmpnc7 clinic5_pnc hc5_pnc hosp5_pnc ///
> clinic10_pnc hc10_pnc hosp10_pnc ///

```

```

> clinic15_pnc hc15_pnc hosp15_pnc ///
> i.religion i.mhealthcheckb4 i.v024 i.csect i.seasons i.tvradio i.moneyfortreat i.age
i.education i.employment i.wealt
> hrural ///
> i.birthnum ib3.nsize i.nsex [pweight=weight] if residence == 1 & del == 1,
family(binomial) link(logit) corr(exchange
> able)

```

```

Iteration 1: tolerance = .13177446
Iteration 2: tolerance = .01338172
Iteration 3: tolerance = .00072368
Iteration 4: tolerance = .00005913
Iteration 5: tolerance = 3.940e-06
Iteration 6: tolerance = 2.416e-07

```

```

GEE population-averaged model
Group variable:          DHSCLUST
Link:                   logit
Family:                 binomial
Correlation:            exchangeable

Number of obs          =    10,083
Number of groups       =         677
Obs per group:
    min =                3
    avg =               14.8
    max =                24

Wald chi2(35)         =    235.38
Prob > chi2           =     0.0000

Scale parameter:      1

```

(Std. Err. adjusted for clustering on DHSCLUST)

| specialmpnc7       | Coef.     | Robust Std. Err. | z     | P> z  | [95% Conf. Interval] |           |
|--------------------|-----------|------------------|-------|-------|----------------------|-----------|
| clinic5_pnc        | -.2018192 | .2482814         | -0.81 | 0.416 | -.6884418            | .2848034  |
| hc5_pnc            | .2813825  | .1245716         | 2.26  | 0.024 | .0372266             | .5255384  |
| hosp5_pnc          | .3063221  | .1789242         | 1.71  | 0.087 | -.0443629            | .6570071  |
| clinic10_pnc       | .0135674  | .1475475         | 0.09  | 0.927 | -.2756203            | .3027551  |
| hc10_pnc           | .3925898  | .1354864         | 2.90  | 0.004 | .1270413             | .6581383  |
| hosp10_pnc         | -.370336  | .1374954         | -2.69 | 0.007 | -.639822             | -.1008501 |
| clinic15_pnc       | -.0338633 | .145728          | -0.23 | 0.816 | -.319485             | .2517584  |
| hc15_pnc           | .0646442  | .1545474         | 0.42  | 0.676 | -.2382632            | .3675515  |
| hosp15_pnc         | -.0155924 | .1308651         | -0.12 | 0.905 | -.2720833            | .2408985  |
| religion           |           |                  |       |       |                      |           |
| other christian    | -.1220516 | .0941086         | -1.30 | 0.195 | -.3065011            | .0623979  |
| muslim/no religion | -.1305404 | .1362952         | -0.96 | 0.338 | -.3976742            | .1365933  |
| 1.mhealthcheckb4   | .8894639  | .0766105         | 11.61 | 0.000 | .7393101             | 1.039618  |
| v024               |           |                  |       |       |                      |           |
| central region     | -.6150741 | .1618606         | -3.80 | 0.000 | -.9323151            | -.2978332 |
| southern region    | -.3254431 | .1626418         | -2.00 | 0.045 | -.6442151            | -.0066711 |
| 1.csect            | .1664578  | .1314079         | 1.27  | 0.205 | -.091097             | .4240126  |
| seasons            |           |                  |       |       |                      |           |
| winter-dry season  | .0013552  | .070734          | 0.02  | 0.985 | -.1372809            | .1399912  |
| hot-dry season     | .0517279  | .091918          | 0.56  | 0.574 | -.1284281            | .2318839  |

|                 |           |          |        |       |           |           |
|-----------------|-----------|----------|--------|-------|-----------|-----------|
| 1.tvradio       | -.0053402 | .0835728 | -0.06  | 0.949 | -.1691399 | .1584594  |
| 1.moneyfortreat | .0646943  | .087644  | 0.74   | 0.460 | -.1070849 | .2364734  |
| age             |           |          |        |       |           |           |
| 25-34           | .1062255  | .0969174 | 1.10   | 0.273 | -.0837291 | .29618    |
| 35-49           | .2019327  | .1236915 | 1.63   | 0.103 | -.0404982 | .4443636  |
| education       |           |          |        |       |           |           |
| primary         | .0776962  | .0899057 | 0.86   | 0.387 | -.0985157 | .253908   |
| secondary       | .3828745  | .155203  | 2.47   | 0.014 | .0786823  | .6870667  |
| 1.employment    | .2704895  | .0841596 | 3.21   | 0.001 | .1055397  | .4354394  |
| wealthrural     |           |          |        |       |           |           |
| 2               | .0669983  | .102315  | 0.65   | 0.513 | -.1335353 | .2675319  |
| 3               | .0911871  | .0965416 | 0.94   | 0.345 | -.0980311 | .2804052  |
| 4               | .1314842  | .1147275 | 1.15   | 0.252 | -.0933776 | .3563461  |
| 5               | .2050108  | .1366364 | 1.50   | 0.134 | -.0627917 | .4728133  |
| birthnum        |           |          |        |       |           |           |
| 2-3             | .1983242  | .1134783 | 1.75   | 0.081 | -.0240893 | .4207376  |
| 4+              | .1090067  | .133595  | 0.82   | 0.415 | -.1528346 | .3708481  |
| nsize           |           |          |        |       |           |           |
| 1               | .2033355  | .1236607 | 1.64   | 0.100 | -.039035  | .445706   |
| 2               | .0866715  | .097192  | 0.89   | 0.373 | -.1038214 | .2771644  |
| 4               | .0132485  | .1131023 | 0.12   | 0.907 | -.2084279 | .2349248  |
| 5               | -.3980751 | .2137418 | -1.86  | 0.063 | -.8170014 | .0208512  |
| nsex            |           |          |        |       |           |           |
| female          | .0298801  | .0683604 | 0.44   | 0.662 | -.1041038 | .163864   |
| _cons           | -2.896363 | .2448884 | -11.83 | 0.000 | -3.376336 | -2.416391 |

-----

. margins, dydx(\*)

Average marginal effects  
 Model VCE : Robust

Number of obs = 10,083

Expression : Pr(specialmpnc7 != 0), predict()

dy/dx w.r.t. : clinic5\_pnc hc5\_pnc hosp5\_pnc clinic10\_pnc hc10\_pnc hosp10\_pnc clinic15\_pnc  
 hc15\_pnc hosp15\_pnc

2.religion 3.religion 1.mhealthcheckb4 2.v024 3.v024 1.csect 2.seasons  
 3.seasons 1.tvradio

1.moneyfortreat 2.age 3.age 2.education 3.education 1.employment

2.wealthrural 3.wealthrural

4.wealthrural 5.wealthrural 2.birthnum 3.birthnum 1.nsize 2.nsize 4.nsize  
 5.nsize 1.nsex

|             | Delta-method |           |       |       | [95% Conf. Interval] |          |
|-------------|--------------|-----------|-------|-------|----------------------|----------|
|             | dy/dx        | Std. Err. | z     | P> z  |                      |          |
| clinic5_pnc | -.0226583    | .0279112  | -0.81 | 0.417 | -.0773633            | .0320467 |
| hc5_pnc     | .0315909     | .0139608  | 2.26  | 0.024 | .0042283             | .0589535 |

|                    |           |          |       |       |           |           |
|--------------------|-----------|----------|-------|-------|-----------|-----------|
| hosp5_pnc          | .0343909  | .020228  | 1.70  | 0.089 | -.0052554 | .0740371  |
| clinic10_pnc       | .0015232  | .0165633 | 0.09  | 0.927 | -.0309402 | .0339866  |
| hc10_pnc           | .0440762  | .015478  | 2.85  | 0.004 | .0137399  | .0744124  |
| hosp10_pnc         | -.0415777 | .0155871 | -2.67 | 0.008 | -.0721279 | -.0110275 |
| clinic15_pnc       | -.0038018 | .0163753 | -0.23 | 0.816 | -.0358969 | .0282932  |
| hc15_pnc           | .0072576  | .0173704 | 0.42  | 0.676 | -.0267877 | .0413029  |
| hosp15_pnc         | -.0017506 | .0146845 | -0.12 | 0.905 | -.0305317 | .0270306  |
| religion           |           |          |       |       |           |           |
| other christian    | -.0140881 | .0111344 | -1.27 | 0.206 | -.0359111 | .0077348  |
| muslim/no religion | -.0150267 | .01559   | -0.96 | 0.335 | -.0455826 | .0155292  |
| 1.mhealthcheckb4   | .1000912  | .0089712 | 11.16 | 0.000 | .0825079  | .1176745  |
| v024               |           |          |       |       |           |           |
| central region     | -.0736597 | .0204574 | -3.60 | 0.000 | -.1137555 | -.033564  |
| southern region    | -.0425934 | .0220439 | -1.93 | 0.053 | -.0857986 | .0006118  |
| 1.csect            | .0195982  | .0161343 | 1.21  | 0.224 | -.0120245 | .0512209  |
| seasons            |           |          |       |       |           |           |
| winter-dry season  | .0001512  | .0078899 | 0.02  | 0.985 | -.0153128 | .0156151  |
| hot-dry season     | .0058664  | .010461  | 0.56  | 0.575 | -.0146368 | .0263696  |
| 1.tvradio          | -.0005993 | .009377  | -0.06 | 0.949 | -.0189779 | .0177792  |
| 1.moneyfortreat    | .0072422  | .0098441 | 0.74  | 0.462 | -.0120518 | .0265362  |
| age                |           |          |       |       |           |           |
| 25-34              | .0116715  | .0105368 | 1.11  | 0.268 | -.0089804 | .0323233  |
| 35-49              | .0229082  | .0141157 | 1.62  | 0.105 | -.004758  | .0505743  |
| education          |           |          |       |       |           |           |
| primary            | .0087477  | .0102212 | 0.86  | 0.392 | -.0112854 | .0287808  |
| secondary          | .0475832  | .0213735 | 2.23  | 0.026 | .0056919  | .0894745  |
| 1.employment       | .0293535  | .0087689 | 3.35  | 0.001 | .0121667  | .0465402  |
| wealthrural        |           |          |       |       |           |           |
| 2                  | .0072291  | .0111065 | 0.65  | 0.515 | -.0145392 | .0289973  |
| 3                  | .0099201  | .0105132 | 0.94  | 0.345 | -.0106854 | .0305255  |
| 4                  | .0144998  | .0127293 | 1.14  | 0.255 | -.0104491 | .0394487  |
| 5                  | .0231716  | .0157453 | 1.47  | 0.141 | -.0076887 | .0540319  |
| birthnum           |           |          |       |       |           |           |
| 2-3                | .0220105  | .0122895 | 1.79  | 0.073 | -.0020765 | .0460974  |
| 4+                 | .0117382  | .0143047 | 0.82  | 0.412 | -.0162986 | .0397749  |
| nsize              |           |          |       |       |           |           |
| 1                  | .0239621  | .0151463 | 1.58  | 0.114 | -.005724  | .0536482  |
| 2                  | .0098308  | .011179  | 0.88  | 0.379 | -.0120796 | .0317413  |
| 4                  | .0014665  | .0125501 | 0.12  | 0.907 | -.0231312 | .0260642  |
| 5                  | -.0382971 | .0182128 | -2.10 | 0.035 | -.0739935 | -.0026007 |
| nsex               |           |          |       |       |           |           |
| female             | .003355   | .0077029 | 0.44  | 0.663 | -.0117423 | .0184524  |



-----  
 Note: dy/dx for factor levels is the discrete change from the base level.

```
. xtgee specialpnc7 clinic5_pnc hc5_pnc hosp5_pnc ///
> clinic10_pnc hc10_pnc hosp10_pnc ///
> clinic15_pnc hc15_pnc hosp15_pnc ///
> i.religion i.newborncheckb4 i.v024 i.csect i.seasons i.tvradio i.moneyfortreat i.age
i.education i.employment i.wealt
> hrural ///
> i.birthnum ib3.nsize i.nsex [pweight=weight] if residence == 1 & del == 1,
family(binomial) link(logit) corr(exchange
> able)
```

Iteration 1: tolerance = .13836571  
 Iteration 2: tolerance = .0093803  
 Iteration 3: tolerance = .00042035  
 Iteration 4: tolerance = .0000254  
 Iteration 5: tolerance = 1.554e-06  
 Iteration 6: tolerance = 9.696e-08

GEE population-averaged model  
 Group variable: DHSClust  
 Link: logit  
 Family: binomial  
 Correlation: exchangeable  
 Number of obs = 10,029  
 Number of groups = 677  
 Obs per group: min = 3  
 avg = 14.7  
 max = 24  
 Wald chi2(35) = 182.43  
 Prob > chi2 = 0.0000  
 Scale parameter: 1

(Std. Err. adjusted for clustering on DHSClust)

| specialpnc7        | Coef.     | Robust Std. Err. | z     | P> z  | [95% Conf. Interval] |           |
|--------------------|-----------|------------------|-------|-------|----------------------|-----------|
| clinic5_pnc        | -.7629425 | .2222593         | -3.43 | 0.001 | -1.198563            | -.3273224 |
| hc5_pnc            | .0529879  | .0933395         | 0.57  | 0.570 | -.1299541            | .2359299  |
| hosp5_pnc          | .1163474  | .1289903         | 0.90  | 0.367 | -.1364689            | .3691637  |
| clinic10_pnc       | -.2677441 | .1247598         | -2.15 | 0.032 | -.5122688            | -.0232195 |
| hc10_pnc           | .3944186  | .1034522         | 3.81  | 0.000 | .191656              | .5971812  |
| hosp10_pnc         | -.0555773 | .0957849         | -0.58 | 0.562 | -.2433123            | .1321577  |
| clinic15_pnc       | .1688052  | .1166041         | 1.45  | 0.148 | -.0597347            | .3973451  |
| hc15_pnc           | .1730598  | .1220307         | 1.42  | 0.156 | -.066116             | .4122356  |
| hosp15_pnc         | -.0746097 | .0925828         | -0.81 | 0.420 | -.2560687            | .1068494  |
| religion           |           |                  |       |       |                      |           |
| other christian    | -.0289484 | .07962           | -0.36 | 0.716 | -.1850007            | .127104   |
| muslim/no religion | -.0263034 | .129541          | -0.20 | 0.839 | -.2801991            | .2275923  |
| 1.newborncheckb4   | .4668698  | .0694398         | 6.72  | 0.000 | .3307703             | .6029694  |
| v024               |           |                  |       |       |                      |           |
| central region     | -.7723978 | .1268102         | -6.09 | 0.000 | -1.020941            | -.5238543 |
| southern region    | -.6534478 | .1307384         | -5.00 | 0.000 | -.9096903            | -.3972052 |

|                   |           |          |       |       |           |           |
|-------------------|-----------|----------|-------|-------|-----------|-----------|
| 1.csect           | -.3543213 | .1314997 | -2.69 | 0.007 | -.612056  | -.0965867 |
| seasons           |           |          |       |       |           |           |
| winter-dry season | .0323141  | .0606268 | 0.53  | 0.594 | -.0865122 | .1511404  |
| hot-dry season    | -.0449021 | .0790919 | -0.57 | 0.570 | -.1999194 | .1101152  |
| 1.tvradio         | -.0533907 | .0613147 | -0.87 | 0.384 | -.1735653 | .0667839  |
| 1.moneyfortreat   | -.0036556 | .0651307 | -0.06 | 0.955 | -.1313094 | .1239983  |
| age               |           |          |       |       |           |           |
| 25-34             | -.0885696 | .0870673 | -1.02 | 0.309 | -.2592183 | .0820791  |
| 35-49             | -.1900193 | .1141527 | -1.66 | 0.096 | -.4137544 | .0337158  |
| education         |           |          |       |       |           |           |
| primary           | .1204106  | .0741346 | 1.62  | 0.104 | -.0248906 | .2657118  |
| secondary         | .2016687  | .1296364 | 1.56  | 0.120 | -.0524139 | .4557513  |
| 1.employment      | .2046659  | .0742683 | 2.76  | 0.006 | .0591027  | .350229   |
| wealthrural       |           |          |       |       |           |           |
| 2                 | .0571714  | .0959108 | 0.60  | 0.551 | -.1308104 | .2451531  |
| 3                 | .1662652  | .0966517 | 1.72  | 0.085 | -.0231686 | .355699   |
| 4                 | .2105188  | .0961416 | 2.19  | 0.029 | .0220848  | .3989528  |
| 5                 | .2640491  | .1021233 | 2.59  | 0.010 | .0638912  | .464207   |
| birthnum          |           |          |       |       |           |           |
| 2-3               | .191254   | .0941017 | 2.03  | 0.042 | .0068181  | .3756899  |
| 4+                | .2551589  | .1110702 | 2.30  | 0.022 | .0374654  | .4728524  |
| nsize             |           |          |       |       |           |           |
| 1                 | -.0786368 | .1092832 | -0.72 | 0.472 | -.2928279 | .1355543  |
| 2                 | .1058294  | .0671539 | 1.58  | 0.115 | -.0257899 | .2374487  |
| 4                 | -.092449  | .0927593 | -1.00 | 0.319 | -.274254  | .0893559  |
| 5                 | -.2600292 | .1636699 | -1.59 | 0.112 | -.5808163 | .0607579  |
| nsex              |           |          |       |       |           |           |
| female            | -.0576239 | .0502403 | -1.15 | 0.251 | -.1560931 | .0408452  |
| _cons             | -1.57195  | .2010945 | -7.82 | 0.000 | -1.966088 | -1.177812 |

. margins, dydx(\*)

Average marginal effects  
Model VCE : Robust

Number of obs = 10,029

Expression : Pr(specialpnc7 != 0), predict()

dy/dx w.r.t. : clinic5\_pnc hc5\_pnc hosp5\_pnc clinic10\_pnc hc10\_pnc hosp10\_pnc clinic15\_pnc  
hc15\_pnc hosp15\_pnc

2.religion 3.religion 1.newborncheckb4 2.v024 3.v024 1.csect 2.seasons  
3.seasons 1.tvradio

1.moneyfortreat 2.age 3.age 2.education 3.education 1.employment

2.wealthrural 3.wealthrural

4.wealthrural 5.wealthrural 2.birthnum 3.birthnum 1.nsize 2.nsize 4.nsize

5.nsize 1.nsex

|                    | Delta-method |           |       |       | [95% Conf. Interval] |           |
|--------------------|--------------|-----------|-------|-------|----------------------|-----------|
|                    | dy/dx        | Std. Err. | z     | P> z  |                      |           |
| clinic5_pnc        | -.13358      | .0389629  | -3.43 | 0.001 | -.2099459            | -.0572141 |
| hc5_pnc            | .0092774     | .0163105  | 0.57  | 0.569 | -.0226905            | .0412453  |
| hosp5_pnc          | .0203707     | .0225748  | 0.90  | 0.367 | -.0238751            | .0646165  |
| clinic10_pnc       | -.0468781    | .0217493  | -2.16 | 0.031 | -.0895059            | -.0042502 |
| hc10_pnc           | .0690569     | .0181411  | 3.81  | 0.000 | .033501              | .1046128  |
| hosp10_pnc         | -.0097308    | .0168011  | -0.58 | 0.562 | -.0426604            | .0231988  |
| clinic15_pnc       | .0295553     | .0204348  | 1.45  | 0.148 | -.0104962            | .0696069  |
| hc15_pnc           | .0303002     | .021387   | 1.42  | 0.157 | -.0116175            | .072218   |
| hosp15_pnc         | -.0130631    | .0162396  | -0.80 | 0.421 | -.0448921            | .018766   |
| religion           |              |           |       |       |                      |           |
| other christian    | -.0050911    | .0140698  | -0.36 | 0.717 | -.0326674            | .0224853  |
| muslim/no religion | -.0046288    | .0227598  | -0.20 | 0.839 | -.0492373            | .0399796  |
| 1.newborncheckb4   | .078868      | .011404   | 6.92  | 0.000 | .0565167             | .1012194  |
| v024               |              |           |       |       |                      |           |
| central region     | -.1507043    | .0256906  | -5.87 | 0.000 | -.2010569            | -.1003516 |
| southern region    | -.130667     | .0271298  | -4.82 | 0.000 | -.1838404            | -.0774937 |
| 1.csect            | -.0572786    | .0196147  | -2.92 | 0.003 | -.0957227            | -.0188345 |
| seasons            |              |           |       |       |                      |           |
| winter-dry season  | .0056969     | .0106824  | 0.53  | 0.594 | -.0152402            | .0266339  |
| hot-dry season     | -.0077696    | .0136549  | -0.57 | 0.569 | -.0345327            | .0189935  |
| 1.tvradio          | -.0093188    | .0106705  | -0.87 | 0.382 | -.0302325            | .0115949  |
| 1.moneyfortreat    | -.0006401    | .011405   | -0.06 | 0.955 | -.0229934            | .0217132  |
| age                |              |           |       |       |                      |           |
| 25-34              | -.0157263    | .0155092  | -1.01 | 0.311 | -.0461238            | .0146713  |
| 35-49              | -.0329263    | .0196485  | -1.68 | 0.094 | -.0714367            | .0055841  |
| education          |              |           |       |       |                      |           |
| primary            | .0213594     | .0133482  | 1.60  | 0.110 | -.0048027            | .0475215  |
| secondary          | .0364539     | .0244533  | 1.49  | 0.136 | -.0114736            | .0843815  |
| 1.employment       | .0351888     | .0125059  | 2.81  | 0.005 | .0106776             | .0596999  |
| wealthrural        |              |           |       |       |                      |           |
| 2                  | .0095358     | .0160481  | 0.59  | 0.552 | -.021918             | .0409896  |
| 3                  | .0285107     | .0165861  | 1.72  | 0.086 | -.0039974            | .0610189  |
| 4                  | .0364952     | .0166591  | 2.19  | 0.028 | .0038441             | .0691463  |
| 5                  | .0463708     | .0179773  | 2.58  | 0.010 | .0111359             | .0816058  |
| birthnum           |              |           |       |       |                      |           |
| 2-3                | .0322408     | .0155041  | 2.08  | 0.038 | .0018533             | .0626283  |
| 4+                 | .0437046     | .0187039  | 2.34  | 0.019 | .0070457             | .0803636  |
| nsize              |              |           |       |       |                      |           |
| 1                  | -.0135319    | .0185949  | -0.73 | 0.467 | -.0499773            | .0229134  |

|        |  |           |          |       |       |           |          |
|--------|--|-----------|----------|-------|-------|-----------|----------|
| 2      |  | .0190358  | .0121423 | 1.57  | 0.117 | -.0047626 | .0428343 |
| 4      |  | -.0158541 | .0157256 | -1.01 | 0.313 | -.0466758 | .0149676 |
| 5      |  | -.0427139 | .0256007 | -1.67 | 0.095 | -.0928903 | .0074625 |
| nsex   |  |           |          |       |       |           |          |
| female |  | -.0100886 | .0087938 | -1.15 | 0.251 | -.0273242 | .0071469 |

-----  
Note: dy/dx for factor levels is the discrete change from the base level.

```
.
. ***Appendix analysis
. xtgee binarympnc1 clinic5_pnc hc5_pnc hosp5_pnc ///
> clinic10_pnc hc10_pnc hosp10_pnc ///
> clinic15_pnc hc15_pnc hosp15_pnc ///
> i.religion i.mhealthcheckb4 i.v024 i.csect i.seasons i.tvradio i.moneyfortreat i.age
i.education i.employment i.wealt
> hrural ///
> i.birthnum ib3.nsize i.nsex [pweight=weight] if residence == 1 & del == 1,
family(binomial) link(logit) corr(exchange
> able)
```

```
Iteration 1: tolerance = .05492604
Iteration 2: tolerance = .00628765
Iteration 3: tolerance = .00071345
Iteration 4: tolerance = .00009752
Iteration 5: tolerance = .00001345
Iteration 6: tolerance = 1.808e-06
Iteration 7: tolerance = 2.442e-07
```

```
GEE population-averaged model
Group variable:          DHSCLUST
Link:                   logit
Family:                 binomial
Correlation:            exchangeable

Number of obs          =    10,083
Number of groups       =         677
Obs per group:
   min =                 3
   avg  =                14.8
   max  =                 24

Wald chi2(35)         =    121.69
Prob > chi2           =     0.0000

Scale parameter:      1
```

(Std. Err. adjusted for clustering on DHSCLUST)

| binarympnc1     | Coef.     | Robust Std. Err. | z     | P> z  | [95% Conf. Interval] |           |
|-----------------|-----------|------------------|-------|-------|----------------------|-----------|
| clinic5_pnc     | .7213267  | .4648088         | 1.55  | 0.121 | -.1896818            | 1.632335  |
| hc5_pnc         | -.1551871 | .2079307         | -0.75 | 0.455 | -.5627237            | .2523495  |
| hosp5_pnc       | -.9690941 | .3623933         | -2.67 | 0.007 | -1.679372            | -.2588164 |
| clinic10_pnc    | .1935191  | .2879419         | 0.67  | 0.502 | -.3708367            | .7578749  |
| hc10_pnc        | .0083564  | .2433989         | 0.03  | 0.973 | -.4686966            | .4854095  |
| hosp10_pnc      | -.1127109 | .2294112         | -0.49 | 0.623 | -.5623486            | .3369267  |
| clinic15_pnc    | -.4595652 | .2368834         | -1.94 | 0.052 | -.923848             | .0047176  |
| hc15_pnc        | -.3028738 | .2393296         | -1.27 | 0.206 | -.7719511            | .1662036  |
| hosp15_pnc      | -.3926164 | .2204031         | -1.78 | 0.075 | -.8245986            | .0393658  |
| religion        |           |                  |       |       |                      |           |
| other christian | .1183318  | .2110712         | 0.56  | 0.575 | -.2953601            | .5320238  |

|                    |            |          |       |       |           |           |
|--------------------|------------|----------|-------|-------|-----------|-----------|
| muslim/no religion | -0.8845428 | .3741159 | -2.36 | 0.018 | -1.617796 | -.1512892 |
| 1.mhealthcheckb4   | 1.045036   | .1865284 | 5.60  | 0.000 | .6794467  | 1.410624  |
| v024               |            |          |       |       |           |           |
| central region     | -1.30015   | .3058855 | -4.25 | 0.000 | -1.899675 | -.7006254 |
| southern region    | -.1568247  | .28898   | -0.54 | 0.587 | -.7232151 | .4095656  |
| 1.csect            | .1357371   | .3444462 | 0.39  | 0.694 | -.5393651 | .8108393  |
| seasons            |            |          |       |       |           |           |
| winter-dry season  | -.4689713  | .1816033 | -2.58 | 0.010 | -.8249073 | -.1130353 |
| hot-dry season     | -.3066991  | .2243257 | -1.37 | 0.172 | -.7463693 | .1329712  |
| 1.tvradio          | .2937194   | .1834508 | 1.60  | 0.109 | -.0658376 | .6532763  |
| 1.moneyfortreat    | .2809621   | .1875293 | 1.50  | 0.134 | -.0865885 | .6485128  |
| age                |            |          |       |       |           |           |
| 25-34              | -.0799232  | .2136347 | -0.37 | 0.708 | -.4986395 | .338793   |
| 35-49              | -.1107844  | .3143305 | -0.35 | 0.725 | -.7268608 | .5052921  |
| education          |            |          |       |       |           |           |
| primary            | -.0832832  | .192382  | -0.43 | 0.665 | -.460345  | .2937786  |
| secondary          | .0059672   | .5433205 | 0.01  | 0.991 | -1.058921 | 1.070856  |
| 1.employment       | -.1410728  | .168207  | -0.84 | 0.402 | -.4707525 | .1886069  |
| wealthrural        |            |          |       |       |           |           |
| 2                  | .2439843   | .2394932 | 1.02  | 0.308 | -.2254137 | .7133824  |
| 3                  | .0747846   | .2509899 | 0.30  | 0.766 | -.4171466 | .5667159  |
| 4                  | -.2102195  | .2827288 | -0.74 | 0.457 | -.7643577 | .3439187  |
| 5                  | -.0479474  | .3093492 | -0.15 | 0.877 | -.6542606 | .5583658  |
| birthnum           |            |          |       |       |           |           |
| 2-3                | -.0039298  | .2223776 | -0.02 | 0.986 | -.439782  | .4319223  |
| 4+                 | -.1056672  | .2890567 | -0.37 | 0.715 | -.6722079 | .4608735  |
| nsize              |            |          |       |       |           |           |
| 1                  | -.236357   | .3290085 | -0.72 | 0.473 | -.8812019 | .4084878  |
| 2                  | -.2745631  | .2016245 | -1.36 | 0.173 | -.6697398 | .1206137  |
| 4                  | -.2820862  | .2832901 | -1.00 | 0.319 | -.8373245 | .2731521  |
| 5                  | -.0988556  | .3926725 | -0.25 | 0.801 | -.8684795 | .6707683  |
| nsex               |            |          |       |       |           |           |
| female             | .0927126   | .1543464 | 0.60  | 0.548 | -.2098009 | .3952261  |
| _cons              | -3.254268  | .5589815 | -5.82 | 0.000 | -4.349852 | -2.158685 |

-----

. margins, dydx(\*)

Average marginal effects  
Model VCE : Robust

Number of obs = 10,083

Expression : Pr(binarympnc1 != 0), predict()

dy/dx w.r.t. : clinic5\_pnc hc5\_pnc hosp5\_pnc clinic10\_pnc hc10\_pnc hosp10\_pnc clinic15\_pnc

hc15\_pnc hosp15\_pnc  
     2.religion 3.religion 1.mhealthcheckb4 2.v024 3.v024 1.csect 2.seasons  
 3.seasons 1.tvradio  
     1.moneyfortreat 2.age 3.age 2.education 3.education 1.employment  
 2.wealthrural 3.wealthrural  
     4.wealthrural 5.wealthrural 2.birthnum 3.birthnum 1.nsize 2.nsize 4.nsize  
 5.nsize 1.nsex

|                    | Delta-method |           |       |       | [95% Conf. Interval] |           |
|--------------------|--------------|-----------|-------|-------|----------------------|-----------|
|                    | dy/dx        | Std. Err. | z     | P> z  |                      |           |
| clinic5_pnc        | .0143076     | .0094904  | 1.51  | 0.132 | -.0042934            | .0329085  |
| hc5_pnc            | -.0030781    | .0041321  | -0.74 | 0.456 | -.011177             | .0050207  |
| hosp5_pnc          | -.019222     | .007577   | -2.54 | 0.011 | -.0340726            | -.0043715 |
| clinic10_pnc       | .0038385     | .0057711  | 0.67  | 0.506 | -.0074728            | .0151497  |
| hc10_pnc           | .0001658     | .0048301  | 0.03  | 0.973 | -.0093011            | .0096326  |
| hosp10_pnc         | -.0022356    | .0045921  | -0.49 | 0.626 | -.011236             | .0067647  |
| clinic15_pnc       | -.0091155    | .0049898  | -1.83 | 0.068 | -.0188954            | .0006644  |
| hc15_pnc           | -.0060075    | .0047532  | -1.26 | 0.206 | -.0153236            | .0033086  |
| hosp15_pnc         | -.0077876    | .0044498  | -1.75 | 0.080 | -.016509             | .0009338  |
| religion           |              |           |       |       |                      |           |
| other christian    | .0025614     | .0043975  | 0.58  | 0.560 | -.0060576            | .0111803  |
| muslim/no religion | -.0123316    | .0052788  | -2.34 | 0.019 | -.0226778            | -.0019854 |
| 1.mhealthcheckb4   | .0200537     | .0039375  | 5.09  | 0.000 | .0123364             | .027771   |
| v024               |              |           |       |       |                      |           |
| central region     | -.023727     | .0076962  | -3.08 | 0.002 | -.0388113            | -.0086427 |
| southern region    | -.0045818    | .0087207  | -0.53 | 0.599 | -.021674             | .0125104  |
| 1.csect            | .0028409     | .0076263  | 0.37  | 0.710 | -.0121063            | .0177882  |
| seasons            |              |           |       |       |                      |           |
| winter-dry season  | -.0090584    | .0034906  | -2.60 | 0.009 | -.0158999            | -.0022168 |
| hot-dry season     | -.0063557    | .0044843  | -1.42 | 0.156 | -.0151448            | .0024334  |
| 1.tvradio          | .0059821     | .0039272  | 1.52  | 0.128 | -.0017151            | .0136792  |
| 1.moneyfortreat    | .0055003     | .0037023  | 1.49  | 0.137 | -.0017561            | .0127566  |
| age                |              |           |       |       |                      |           |
| 25-34              | -.0016054    | .0043093  | -0.37 | 0.709 | -.0100514            | .0068407  |
| 35-49              | -.0021944    | .0061354  | -0.36 | 0.721 | -.0142196            | .0098307  |
| education          |              |           |       |       |                      |           |
| primary            | -.0016194    | .0036944  | -0.44 | 0.661 | -.0088602            | .0056214  |
| secondary          | .0001208     | .0110277  | 0.01  | 0.991 | -.0214931            | .0217348  |
| 1.employment       | -.0028557    | .0034523  | -0.83 | 0.408 | -.0096221            | .0039106  |
| wealthrural        |              |           |       |       |                      |           |
| 2                  | .0053119     | .0051224  | 1.04  | 0.300 | -.0047278            | .0153517  |
| 3                  | .0015048     | .0050297  | 0.30  | 0.765 | -.0083533            | .0113629  |
| 4                  | -.0037151    | .0050463  | -0.74 | 0.462 | -.0136056            | .0061755  |

|          |           |          |       |       |           |          |
|----------|-----------|----------|-------|-------|-----------|----------|
| 5        | -.0009119 | .0058832 | -0.16 | 0.877 | -.0124427 | .0106189 |
| birthnum |           |          |       |       |           |          |
| 2-3      | -.0000809 | .0045811 | -0.02 | 0.986 | -.0090596 | .0088979 |
| 4+       | -.0020766 | .0057545 | -0.36 | 0.718 | -.0133552 | .009202  |
| nsize    |           |          |       |       |           |          |
| 1        | -.0047123 | .0060533 | -0.78 | 0.436 | -.0165767 | .007152  |
| 2        | -.0053823 | .0038152 | -1.41 | 0.158 | -.0128599 | .0020952 |
| 4        | -.0055115 | .005039  | -1.09 | 0.274 | -.0153877 | .0043647 |
| 5        | -.0020957 | .0080219 | -0.26 | 0.794 | -.0178182 | .0136269 |
| nsex     |           |          |       |       |           |          |
| female   | .00184    | .0030505 | 0.60  | 0.546 | -.0041389 | .007819  |

Note: dy/dx for factor levels is the discrete change from the base level.

```
. xtgee binarypnc1 clinic5_pnc hc5_pnc hosp5_pnc ///
> clinic10_pnc hc10_pnc hosp10_pnc ///
> clinic15_pnc hc15_pnc hosp15_pnc ///
> i.religion i.newborncheckb4 i.v024 i.csect i.seasons i.tvradio i.moneyfortreat i.age
i.education i.employment i.wealt
> hrural ///
> i.birthnum ib3.nsize i.nsex [pweight=weight] if residence == 1 & del == 1,
family(binomial) link(logit) corr(exchange
> able)
```

```
Iteration 1: tolerance = .07039326
Iteration 2: tolerance = .00476555
Iteration 3: tolerance = .00041952
Iteration 4: tolerance = .00003763
Iteration 5: tolerance = 3.219e-06
Iteration 6: tolerance = 2.738e-07
```

```
GEE population-averaged model
Group variable:          DHSCLUST      Number of obs      =      10,029
Link:                   logit          Number of groups   =         677
Family:                 binomial       Obs per group:
Correlation:           exchangeable    min =                3
                                                avg =               14.7
                                                max =                24
                                                Wald chi2(35)      =       74.44
Scale parameter:       1              Prob > chi2        =       0.0001
```

(Std. Err. adjusted for clustering on DHSCLUST)

| binarypnc1   | Coef.     | Robust Std. Err. | z     | P> z  | [95% Conf. Interval] |          |
|--------------|-----------|------------------|-------|-------|----------------------|----------|
| clinic5_pnc  | .1592292  | .4533041         | 0.35  | 0.725 | -.7292306            | 1.047689 |
| hc5_pnc      | -.0878108 | .2072615         | -0.42 | 0.672 | -.4940359            | .3184142 |
| hosp5_pnc    | -.3815608 | .3348106         | -1.14 | 0.254 | -1.037778            | .2746558 |
| clinic10_pnc | .3140642  | .2638555         | 1.19  | 0.234 | -.2030831            | .8312115 |
| hc10_pnc     | .0107584  | .2246796         | 0.05  | 0.962 | -.4296056            | .4511224 |
| hosp10_pnc   | -.2508252 | .2200244         | -1.14 | 0.254 | -.6820651            | .1804148 |

|                    |           |          |       |       |           |           |
|--------------------|-----------|----------|-------|-------|-----------|-----------|
| clinic15_pnc       | -.2159594 | .2358621 | -0.92 | 0.360 | -.6782407 | .2463218  |
| hc15_pnc           | -.0103317 | .2760479 | -0.04 | 0.970 | -.5513757 | .5307122  |
| hosp15_pnc         | -.5034406 | .2162782 | -2.33 | 0.020 | -.9273381 | -.0795432 |
| religion           |           |          |       |       |           |           |
| other christian    | -.0079197 | .2414954 | -0.03 | 0.974 | -.4812419 | .4654026  |
| muslim/no religion | -.8244875 | .3700309 | -2.23 | 0.026 | -1.549735 | -.0992403 |
| 1.newborncheckb4   | .8187613  | .2180956 | 3.75  | 0.000 | .3913018  | 1.246221  |
| v024               |           |          |       |       |           |           |
| central region     | -.1662744 | .34166   | -0.49 | 0.626 | -.8359157 | .5033668  |
| southern region    | .6942752  | .3253216 | 2.13  | 0.033 | .0566566  | 1.331894  |
| 1.csect            | -.8705064 | .5477849 | -1.59 | 0.112 | -1.944145 | .2031322  |
| seasons            |           |          |       |       |           |           |
| winter-dry season  | -.0378576 | .168134  | -0.23 | 0.822 | -.3673942 | .291679   |
| hot-dry season     | -.3442228 | .2252901 | -1.53 | 0.127 | -.7857833 | .0973376  |
| 1.tvradio          | .5112954  | .1654452 | 3.09  | 0.002 | .1870288  | .835562   |
| 1.moneyfortreat    | .222512   | .1906698 | 1.17  | 0.243 | -.151194  | .596218   |
| age                |           |          |       |       |           |           |
| 25-34              | -.0571585 | .2497972 | -0.23 | 0.819 | -.5467521 | .4324351  |
| 35-49              | .0138417  | .3213793 | 0.04  | 0.966 | -.6160502 | .6437336  |
| education          |           |          |       |       |           |           |
| primary            | -.2265254 | .2171458 | -1.04 | 0.297 | -.6521233 | .1990725  |
| secondary          | -.4866257 | .4533709 | -1.07 | 0.283 | -1.375216 | .401965   |
| 1.employment       | .2196585  | .1918304 | 1.15  | 0.252 | -.1563222 | .5956392  |
| wealthrural        |           |          |       |       |           |           |
| 2                  | .1244027  | .2300126 | 0.54  | 0.589 | -.3264137 | .575219   |
| 3                  | -.0551581 | .2331566 | -0.24 | 0.813 | -.5121367 | .4018205  |
| 4                  | .0858332  | .2563297 | 0.33  | 0.738 | -.4165638 | .5882303  |
| 5                  | -.5613781 | .2962781 | -1.89 | 0.058 | -1.142072 | .0193162  |
| birthnum           |           |          |       |       |           |           |
| 2-3                | -.0420841 | .2375211 | -0.18 | 0.859 | -.5076168 | .4234487  |
| 4+                 | -.2449537 | .2972758 | -0.82 | 0.410 | -.8276035 | .3376962  |
| nsize              |           |          |       |       |           |           |
| 1                  | -.1144312 | .3137006 | -0.36 | 0.715 | -.729273  | .5004107  |
| 2                  | .0998381  | .2140163 | 0.47  | 0.641 | -.3196262 | .5193024  |
| 4                  | .2353946  | .2447188 | 0.96  | 0.336 | -.2442454 | .7150345  |
| 5                  | -.1651065 | .3894495 | -0.42 | 0.672 | -.9284135 | .5982006  |
| nsex               |           |          |       |       |           |           |
| female             | -.0734919 | .1552193 | -0.47 | 0.636 | -.3777161 | .2307323  |
| _cons              | -4.708283 | .6046381 | -7.79 | 0.000 | -5.893352 | -3.523214 |

. margins, dydx(\*)





|              |           |          |       |       |           |          |
|--------------|-----------|----------|-------|-------|-----------|----------|
| 1.employment | .0037014  | .0031482 | 1.18  | 0.240 | -.002469  | .0098717 |
| wealthrural  |           |          |       |       |           |          |
| 2            | .0024107  | .0044498 | 0.54  | 0.588 | -.0063107 | .0111322 |
| 3            | -.0009822 | .0041561 | -0.24 | 0.813 | -.009128  | .0071636 |
| 4            | .0016331  | .0048891 | 0.33  | 0.738 | -.0079493 | .0112155 |
| 5            | -.0079551 | .004196  | -1.90 | 0.058 | -.0161791 | .000269  |
| birthnum     |           |          |       |       |           |          |
| 2-3          | -.0008083 | .0045917 | -0.18 | 0.860 | -.0098078 | .0081913 |
| 4+           | -.004287  | .0053209 | -0.81 | 0.420 | -.0147158 | .0061418 |
| nsize        |           |          |       |       |           |          |
| 1            | -.0018354 | .0048715 | -0.38 | 0.706 | -.0113833 | .0077125 |
| 2            | .0017711  | .0038497 | 0.46  | 0.645 | -.0057741 | .0093163 |
| 4            | .0044565  | .004936  | 0.90  | 0.367 | -.0052179 | .0141308 |
| 5            | -.0025868 | .0057046 | -0.45 | 0.650 | -.0137677 | .008594  |
| nsex         |           |          |       |       |           |          |
| female       | -.001291  | .0027339 | -0.47 | 0.637 | -.0066493 | .0040673 |

-----  
Note: dy/dx for factor levels is the discrete change from the base level.

.  
end of do-file

-----  
-----
