# Supplementary material for: Availability of health facilities and utilization of maternal and newborn postnatal care in rural Malawi
Source: PubMed Central journal article supplement (PMC6918704; doi:10.1186/s12884-019-2534-x), 2019-12-17
Supplement: 12884_2019_2534_MOESM3_ESM.pdf [file 12884_2019_2534_MOESM3_ESM.pdf]

List of variables:

/\*\*Set up\*\*/

DHSClust = clustering variable  
Weight = individual sampling weight  
del = place of delivery (0 for home delivery and 1 for facility delivery)  
del2 = place of delivery (1 for home delivery and 0 for facility delivery)  
v021 = primary sampling unit  
v022 = stratification used  
residence = urban/rural (1 for rural and 0 for urban)

/\*\*Outcomes\*\*/

binarympnc1 = maternal postnatal care within 1 day  
binarympnc7 = maternal postnatal care within 7 days  
binarypnc1 = newborn postnatal care within 1 day  
binarypnc7 = newborn postnatal care within 7 days

/\*\*Facility Indicators\*\*/

clinic5\_pnc = clinic-level facilities providing postnatal care within 5 km of household cluster  
hc5\_pnc = health centers providing postnatal care within 5 km of household cluster  
hosp5\_pnc = hospitals providing postnatal care within 5 km of household cluster  
clinic10\_pnc = clinic-level facilities providing postnatal care between 5 km and 10 km of household cluster  
hc10\_pnc = health centers providing postnatal care between 5 km and 10 km of household cluster  
hosp10\_pnc = hospitals providing postnatal care between 5 km and 10 km of household cluster  
clinic15\_pnc = clinic-level facilities providing postnatal care between 10 km and 15 km of household cluster  
hc15\_pnc = health centers providing postnatal care between 10 km and 15 km of household cluster  
hosp15\_pnc = hospitals providing postnatal care between 10 km and 15 km of household cluster

/\*\*Covariates\*\*/

religion = women's religion  
v024 = region of the country where women live  
seasons = seasons in which women gave birth  
tvradio = ownership of TV or radio  
moneyfortreat = cost of treatment being a perceived problem  
age = women's age  
education = women's education  
employment = women's employment  
wealthrural = rural-specific household wealth quintile  
birthnum = women's number of births  
nsize = newborn size  
nsex = newborn sex  
mhealthcheckb4 = maternal health checked before facility discharge (for facility births)  
newborncheckb4 = newborn health checked before facility discharge (for facility births)  
csect = receipt of cesarean section

```

. /*****
> sensitivity analysis:
> running
>
> svy:logit
>
> for comparison with xtgee
> *****/
.
. /*****
> Home
> Delivery
> Only
> *****/
.
. ****Survey weights
. gen weight = v005/1000000
(1 missing value generated)

. svyset [pweight=weight], psu(v021) strata(v022)

      pweight: weight
             VCE: linearized
Single unit: missing
  Strata 1: v022
        SU 1: v021
        FPC 1: <zero>

.
. ****Analysis commands
. svy, subpop(del2 if residence == 1):logit binarympnc1 clinic5_pnc hc5_pnc hosp5_pnc ///
> clinic10_pnc hc10_pnc hosp10_pnc ///
> clinic15_pnc hc15_pnc hosp15_pnc ///
> i.religion i.v024 i.seasons i.tvradio i.moneyfortreat i.age i.education i.employment
i.wealthrural ///
> i.birthnum i.nsize i.nsex
(running logit on estimation sample)

```

Survey: Logistic regression

|                  |   |     |                 |   |            |
|------------------|---|-----|-----------------|---|------------|
| Number of strata | = | 28  | Number of obs   | = | 10,931     |
| Number of PSUs   | = | 677 | Population size | = | 11,371.089 |
|                  |   |     | Subpop. no. obs | = | 665        |
|                  |   |     | Subpop. size    | = | 771.762269 |
|                  |   |     | Design df       | = | 649        |
|                  |   |     | F( 33, 617)     | = | 2.47       |
|                  |   |     | Prob > F        | = | 0.0000     |

| binarympnc1 | Coef.    | Linearized<br>Std. Err. | t    | P> t  | [95% Conf. Interval] |
|-------------|----------|-------------------------|------|-------|----------------------|
| clinic5_pnc | .4689543 | .7146189                | 0.66 | 0.512 | -.93429 1.872199     |
| hc5_pnc     | .8037216 | .3017                   | 2.66 | 0.008 | .2112956 1.396148    |
| hosp5_pnc   | .2826816 | .4181037                | 0.68 | 0.499 | -.5383176 1.103681   |

|                    |           |          |       |       |           |           |
|--------------------|-----------|----------|-------|-------|-----------|-----------|
| clinic10_pnc       | -.3227672 | .4059522 | -0.80 | 0.427 | -1.119905 | .4743711  |
| hc10_pnc           | .392799   | .346284  | 1.13  | 0.257 | -.2871733 | 1.072771  |
| hosp10_pnc         | .633105   | .3239283 | 1.95  | 0.051 | -.002969  | 1.269179  |
| clinic15_pnc       | -.6292756 | .3794965 | -1.66 | 0.098 | -1.374465 | .1159135  |
| hc15_pnc           | -.1185838 | .4212724 | -0.28 | 0.778 | -.9458053 | .7086377  |
| hosp15_pnc         | .2730744  | .3114736 | 0.88  | 0.381 | -.3385432 | .884692   |
| religion           |           |          |       |       |           |           |
| other christian    | .4941307  | .5273263 | 0.94  | 0.349 | -.5413409 | 1.529602  |
| muslim/no religion | .8281798  | .6082934 | 1.36  | 0.174 | -.3662809 | 2.02264   |
| v024               |           |          |       |       |           |           |
| central region     | -.5605679 | .49082   | -1.14 | 0.254 | -1.524355 | .403219   |
| southern region    | -.6426761 | .472115  | -1.36 | 0.174 | -1.569733 | .2843813  |
| seasons            |           |          |       |       |           |           |
| winter-dry season  | -1.333253 | .4478779 | -2.98 | 0.003 | -2.212717 | -.453788  |
| hot-dry season     | -.3137807 | .4660865 | -0.67 | 0.501 | -1.229    | .6014388  |
| 1.tvradio          | .7963471  | .296584  | 2.69  | 0.007 | .213967   | 1.378727  |
| 1.moneyfortreat    | -.1847489 | .3113118 | -0.59 | 0.553 | -.7960489 | .4265511  |
| age                |           |          |       |       |           |           |
| 25-34              | .2439738  | .4325908 | 0.56  | 0.573 | -.6054727 | 1.09342   |
| 35-49              | .1996337  | .660266  | 0.30  | 0.762 | -1.096882 | 1.496149  |
| education          |           |          |       |       |           |           |
| primary            | .7224109  | .4830036 | 1.50  | 0.135 | -.2260276 | 1.670849  |
| secondary          | .0301387  | 1.064968 | 0.03  | 0.977 | -2.06106  | 2.121337  |
| 1.employment       | .8265339  | .3362284 | 2.46  | 0.014 | .1663071  | 1.486761  |
| wealthrural        |           |          |       |       |           |           |
| 2                  | -1.527109 | .4902645 | -3.11 | 0.002 | -2.489805 | -.5644125 |
| 3                  | -.1969838 | .3300693 | -0.60 | 0.551 | -.8451165 | .4511488  |
| 4                  | -.8908902 | .4495559 | -1.98 | 0.048 | -1.77365  | -.0081306 |
| 5                  | -1.690299 | .665144  | -2.54 | 0.011 | -2.996393 | -.3842046 |
| birthnum           |           |          |       |       |           |           |
| 2-3                | -.8887321 | .6028721 | -1.47 | 0.141 | -2.072547 | .2950831  |
| 4+                 | -.5611786 | .6960806 | -0.81 | 0.420 | -1.928021 | .8056632  |
| nsize              |           |          |       |       |           |           |
| 2                  | .6988296  | .5989976 | 1.17  | 0.244 | -.4773776 | 1.875037  |
| 3                  | 1.121127  | .5238846 | 2.14  | 0.033 | .0924132  | 2.14984   |
| 4                  | -.1057045 | .6301303 | -0.17 | 0.867 | -1.343045 | 1.131636  |
| 5                  | .0920459  | .9426445 | 0.10  | 0.922 | -1.758955 | 1.943047  |
| nsex               |           |          |       |       |           |           |
| female             | .3744744  | .3664653 | 1.02  | 0.307 | -.3451264 | 1.094075  |
| _cons              | -3.03974  | .847856  | -3.59 | 0.000 | -4.704612 | -1.374868 |

-----  
Note: 28 strata omitted because they contain no subpopulation members.

. margins, dydx(\*)



|          |           |          |       |       |           |           |
|----------|-----------|----------|-------|-------|-----------|-----------|
| 4        | -.1078314 | .0536285 | -2.01 | 0.045 | -.2131377 | -.0025251 |
| 5        | -.168184  | .0557598 | -3.02 | 0.003 | -.2776755 | -.0586925 |
| birthnum |           |          |       |       |           |           |
| 2-3      | -.0961441 | .0733938 | -1.31 | 0.191 | -.2402621 | .0479739  |
| 4+       | -.0657786 | .0854176 | -0.77 | 0.442 | -.2335068 | .1019497  |
| nsize    |           |          |       |       |           |           |
| 2        | .0568726  | .0460358 | 1.24  | 0.217 | -.0335245 | .1472696  |
| 3        | .1042727  | .0392052 | 2.66  | 0.008 | .0272885  | .181257   |
| 4        | -.0065223 | .0391764 | -0.17 | 0.868 | -.0834502 | .0704056  |
| 5        | .00609    | .0635255 | 0.10  | 0.924 | -.1186502 | .1308302  |
| nsex     |           |          |       |       |           |           |
| female   | .0382554  | .0374969 | 1.02  | 0.308 | -.0353745 | .1118854  |

Note: dy/dx for factor levels is the discrete change from the base level.

```
.
. svy, subpop(del2 if residence == 1):logit binarympnc7 clinic5_pnc hc5_pnc hosp5_pnc ///
> clinic10_pnc hc10_pnc hosp10_pnc ///
> clinic15_pnc hc15_pnc hosp15_pnc ///
> i.religion i.v024 i.seasons i.tvradio i.moneyfortreat i.age i.education i.employment
i.wealthrural ///
> i.birthnum i.nsize i.nsex
(running logit on estimation sample)
```

Survey: Logistic regression

|                  |   |     |                 |   |            |
|------------------|---|-----|-----------------|---|------------|
| Number of strata | = | 28  | Number of obs   | = | 10,931     |
| Number of PSUs   | = | 677 | Population size | = | 11,371.089 |
|                  |   |     | Subpop. no. obs | = | 665        |
|                  |   |     | Subpop. size    | = | 771.762269 |
|                  |   |     | Design df       | = | 649        |
|                  |   |     | F( 33, 617)     | = | 1.83       |
|                  |   |     | Prob > F        | = | 0.0036     |

| binarympnc7        | Linearized |           |       |       |           | [95% Conf. Interval] |
|--------------------|------------|-----------|-------|-------|-----------|----------------------|
|                    | Coef.      | Std. Err. | t     | P> t  |           |                      |
| clinic5_pnc        | 1.010565   | .5679035  | 1.78  | 0.076 | -.1045847 | 2.125715             |
| hc5_pnc            | .5799468   | .2602093  | 2.23  | 0.026 | .0689931  | 1.090901             |
| hosp5_pnc          | -.0438926  | .3557276  | -0.12 | 0.902 | -.7424086 | .6546233             |
| clinic10_pnc       | -.0400707  | .3032325  | -0.13 | 0.895 | -.6355058 | .5553645             |
| hc10_pnc           | .2300665   | .2702491  | 0.85  | 0.395 | -.3006017 | .7607347             |
| hosp10_pnc         | .5833298   | .2672668  | 2.18  | 0.029 | .0585178  | 1.108142             |
| clinic15_pnc       | -.6066854  | .3237301  | -1.87 | 0.061 | -1.24237  | .0289994             |
| hc15_pnc           | -.291712   | .3539768  | -0.82 | 0.410 | -.98679   | .4033661             |
| hosp15_pnc         | .2083065   | .276439   | 0.75  | 0.451 | -.3345163 | .7511293             |
| religion           |            |           |       |       |           |                      |
| other christian    | .3857305   | .4442921  | 0.87  | 0.386 | -.486693  | 1.258154             |
| muslim/no religion | .5223289   | .5140244  | 1.02  | 0.310 | -.4870228 | 1.531681             |



2.birthnum 3.birthnum 2.nsize 3.nsize 4.nsize 5.nsize 1.nsex

|                    | Delta-method |           |       |       |           | [95% Conf. Interval] |  |
|--------------------|--------------|-----------|-------|-------|-----------|----------------------|--|
|                    | dy/dx        | Std. Err. | t     | P> t  |           |                      |  |
| clinic5_pnc        | .1282709     | .0724998  | 1.77  | 0.077 | -.0140915 | .2706333             |  |
| hc5_pnc            | .0736126     | .033853   | 2.17  | 0.030 | .007138   | .1400871             |  |
| hosp5_pnc          | -.0055713    | .0452215  | -0.12 | 0.902 | -.0943694 | .0832268             |  |
| clinic10_pnc       | -.0050862    | .0385311  | -0.13 | 0.895 | -.0807468 | .0705744             |  |
| hc10_pnc           | .0292023     | .0342889  | 0.85  | 0.395 | -.0381282 | .0965328             |  |
| hosp10_pnc         | .074042      | .0339088  | 2.18  | 0.029 | .0074578  | .1406261             |  |
| clinic15_pnc       | -.0770065    | .0418068  | -1.84 | 0.066 | -.1590995 | .0050865             |  |
| hc15_pnc           | -.037027     | .0446509  | -0.83 | 0.407 | -.1247047 | .0506508             |  |
| hosp15_pnc         | .0264403     | .0351017  | 0.75  | 0.452 | -.0424863 | .0953669             |  |
| religion           |              |           |       |       |           |                      |  |
| other christian    | .0451919     | .0483457  | 0.93  | 0.350 | -.0497409 | .1401247             |  |
| muslim/no religion | .0634917     | .0607699  | 1.04  | 0.297 | -.0558377 | .1828211             |  |
| v024               |              |           |       |       |           |                      |  |
| central region     | -.0219297    | .0555521  | -0.39 | 0.693 | -.1310132 | .0871538             |  |
| southern region    | -.0432455    | .0538751  | -0.80 | 0.422 | -.1490361 | .0625451             |  |
| seasons            |              |           |       |       |           |                      |  |
| winter-dry season  | -.099645     | .0428263  | -2.33 | 0.020 | -.1837397 | -.0155502            |  |
| hot-dry season     | -.0284497    | .0584503  | -0.49 | 0.627 | -.1432243 | .0863249             |  |
| 1.tvradio          | .0652734     | .0386027  | 1.69  | 0.091 | -.0105279 | .1410746             |  |
| 1.moneyfortreat    | -.0009922    | .0369204  | -0.03 | 0.979 | -.07349   | .0715056             |  |
| age                |              |           |       |       |           |                      |  |
| 25-34              | -.0346672    | .0586702  | -0.59 | 0.555 | -.1498736 | .0805391             |  |
| 35-49              | -.0279146    | .085002   | -0.33 | 0.743 | -.1948268 | .1389976             |  |
| education          |              |           |       |       |           |                      |  |
| primary            | .1298332     | .0751711  | 1.73  | 0.085 | -.0177747 | .2774412             |  |
| secondary          | -.0221665    | .11065    | -0.20 | 0.841 | -.2394418 | .1951087             |  |
| 1.employment       | .0784521     | .0311495  | 2.52  | 0.012 | .0172862  | .1396181             |  |
| wealthrural        |              |           |       |       |           |                      |  |
| 2                  | -.1417127    | .0603833  | -2.35 | 0.019 | -.2602829 | -.0231424            |  |
| 3                  | -.0327464    | .0491345  | -0.67 | 0.505 | -.1292281 | .0637353             |  |
| 4                  | -.06647      | .0696855  | -0.95 | 0.341 | -.2033063 | .0703663             |  |
| 5                  | -.1642446    | .0647513  | -2.54 | 0.011 | -.2913919 | -.0370972            |  |
| birthnum           |              |           |       |       |           |                      |  |
| 2-3                | -.1143512    | .0721603  | -1.58 | 0.114 | -.2560471 | .0273446             |  |
| 4+                 | -.0724184    | .0921112  | -0.79 | 0.432 | -.2532903 | .1084535             |  |
| nsize              |              |           |       |       |           |                      |  |
| 2                  | -.0166103    | .0859209  | -0.19 | 0.847 | -.1853269 | .1521063             |  |
| 3                  | -.0007393    | .0756204  | -0.01 | 0.992 | -.1492295 | .1477509             |  |
| 4                  | -.0684348    | .0762685  | -0.90 | 0.370 | -.2181976 | .081328              |  |

|        |           |          |       |       |           |          |
|--------|-----------|----------|-------|-------|-----------|----------|
| 5      | -.0896721 | .0904308 | -0.99 | 0.322 | -.2672444 | .0879003 |
| nsex   |           |          |       |       |           |          |
| female | .0569735  | .0439342 | 1.30  | 0.195 | -.0292968 | .1432438 |

Note: dy/dx for factor levels is the discrete change from the base level.

```
. svy, subpop(del2 if residence == 1):logit binarypnc1 clinic5_pnc hc5_pnc hosp5_pnc ///
> clinic10_pnc hc10_pnc hosp10_pnc ///
> clinic15_pnc hc15_pnc hosp15_pnc ///
> i.religion i.v024 i.seasons i.tvradio i.moneyfortreat i.age i.education i.employment
i.wealthrural ///
> i.birthnum i.nsize i.nsex
(running logit on estimation sample)
```

Survey: Logistic regression

|                  |   |     |                 |   |            |
|------------------|---|-----|-----------------|---|------------|
| Number of strata | = | 28  | Number of obs   | = | 10,930     |
| Number of PSUs   | = | 677 | Population size | = | 11,369.917 |
|                  |   |     | Subpop. no. obs | = | 664        |
|                  |   |     | Subpop. size    | = | 770.591103 |
|                  |   |     | Design df       | = | 649        |
|                  |   |     | F( 33, 617)     | = | 1.58       |
|                  |   |     | Prob > F        | = | 0.0221     |

| binarypnc1         | Coef.     | Linearized<br>Std. Err. | t     | P> t  | [95% Conf. Interval] |           |
|--------------------|-----------|-------------------------|-------|-------|----------------------|-----------|
| clinic5_pnc        | -.3307765 | .6829086                | -0.48 | 0.628 | -1.671754            | 1.010201  |
| hc5_pnc            | .6283333  | .3056533                | 2.06  | 0.040 | .0281446             | 1.228522  |
| hosp5_pnc          | 1.274421  | .5728891                | 2.22  | 0.026 | .1494806             | 2.399361  |
| clinic10_pnc       | .2810775  | .2988207                | 0.94  | 0.347 | -.3056947            | .8678496  |
| hc10_pnc           | .2579889  | .3348703                | 0.77  | 0.441 | -.3995712            | .915549   |
| hosp10_pnc         | .278517   | .2838075                | 0.98  | 0.327 | -.2787748            | .8358088  |
| clinic15_pnc       | -.0780185 | .328598                 | -0.24 | 0.812 | -.7232621            | .567225   |
| hc15_pnc           | .464243   | .4128062                | 1.12  | 0.261 | -.3463539            | 1.27484   |
| hosp15_pnc         | -.0023731 | .2796953                | -0.01 | 0.993 | -.5515901            | .5468438  |
| religion           |           |                         |       |       |                      |           |
| other christian    | .3394777  | .4191723                | 0.81  | 0.418 | -.4836199            | 1.162575  |
| muslim/no religion | .671941   | .5342402                | 1.26  | 0.209 | -.3771068            | 1.720989  |
| v024               |           |                         |       |       |                      |           |
| central region     | -.8275759 | .4482294                | -1.85 | 0.065 | -1.707731            | .0525789  |
| southern region    | -1.458329 | .5393457                | -2.70 | 0.007 | -2.517402            | -.3992554 |
| seasons            |           |                         |       |       |                      |           |
| winter-dry season  | -.5308535 | .3678137                | -1.44 | 0.149 | -1.253102            | .1913951  |
| hot-dry season     | -.0220792 | .3594674                | -0.06 | 0.951 | -.7279387            | .6837803  |
| 1.tvradio          | .3235816  | .2803122                | 1.15  | 0.249 | -.2268467            | .8740099  |
| 1.moneyfortreat    | .1965356  | .3001651                | 0.65  | 0.513 | -.3928763            | .7859475  |





|                    |           |          |       |       |           |           |
|--------------------|-----------|----------|-------|-------|-----------|-----------|
| hosp10_pnc         | .0334964  | .0339459 | 0.99  | 0.324 | -.0331605 | .1001534  |
| clinic15_pnc       | -.0093831 | .039679  | -0.24 | 0.813 | -.0872978 | .0685317  |
| hc15_pnc           | .0558332  | .0492919 | 1.13  | 0.258 | -.0409577 | .1526241  |
| hosp15_pnc         | -.0002854 | .0336425 | -0.01 | 0.993 | -.0663466 | .0657758  |
| religion           |           |          |       |       |           |           |
| other christian    | .0373268  | .0433931 | 0.86  | 0.390 | -.0478811 | .1225346  |
| muslim/no religion | .0809398  | .0651453 | 1.24  | 0.215 | -.0469811 | .2088608  |
| v024               |           |          |       |       |           |           |
| central region     | -.1315806 | .0764672 | -1.72 | 0.086 | -.2817336 | .0185724  |
| southern region    | -.2022867 | .0810867 | -2.49 | 0.013 | -.3615106 | -.0430628 |
| seasons            |           |          |       |       |           |           |
| winter-dry season  | -.0607054 | .0398364 | -1.52 | 0.128 | -.1389292 | .0175185  |
| hot-dry season     | -.002887  | .0468676 | -0.06 | 0.951 | -.0949174 | .0891433  |
| 1.tvradio          | .0396234  | .0349761 | 1.13  | 0.258 | -.0290566 | .1083034  |
| 1.moneyfortreat    | .0234543  | .0353501 | 0.66  | 0.507 | -.0459601 | .0928687  |
| age                |           |          |       |       |           |           |
| 25-34              | .1137246  | .0444886 | 2.56  | 0.011 | .0263656  | .2010835  |
| 35-49              | .0707946  | .0671124 | 1.05  | 0.292 | -.060989  | .2025782  |
| education          |           |          |       |       |           |           |
| primary            | -.0200914 | .0406646 | -0.49 | 0.621 | -.0999415 | .0597587  |
| secondary          | -.1168236 | .0647534 | -1.80 | 0.072 | -.2439751 | .0103279  |
| 1.employment       | .0651955  | .031985  | 2.04  | 0.042 | .0023889  | .1280021  |
| wealthrural        |           |          |       |       |           |           |
| 2                  | .0849796  | .0452978 | 1.88  | 0.061 | -.0039682 | .1739275  |
| 3                  | .1115359  | .0519835 | 2.15  | 0.032 | .0094597  | .213612   |
| 4                  | .0699088  | .0505561 | 1.38  | 0.167 | -.0293645 | .1691821  |
| 5                  | .0834728  | .0540009 | 1.55  | 0.123 | -.0225647 | .1895103  |
| birthnum           |           |          |       |       |           |           |
| 2-3                | -.1321057 | .0830073 | -1.59 | 0.112 | -.295101  | .0308895  |
| 4+                 | -.1791818 | .0962826 | -1.86 | 0.063 | -.3682448 | .0098812  |
| nsize              |           |          |       |       |           |           |
| 2                  | -.0635262 | .0749911 | -0.85 | 0.397 | -.2107806 | .0837282  |
| 3                  | -.0986173 | .0719012 | -1.37 | 0.171 | -.2398044 | .0425698  |
| 4                  | -.1453921 | .0784517 | -1.85 | 0.064 | -.2994419 | .0086577  |
| 5                  | -.1934661 | .0786953 | -2.46 | 0.014 | -.3479942 | -.038938  |
| nsex               |           |          |       |       |           |           |
| female             | .0003482  | .0390675 | 0.01  | 0.993 | -.0763658 | .0770622  |

Note: dy/dx for factor levels is the discrete change from the base level.

```
.
. svy, subpop(del2 if residence == 1):logit binarypnc7 clinic5_pnc hc5_pnc hosp5_pnc ///
> clinic10_pnc hc10_pnc hosp10_pnc ///
> clinic15_pnc hc15_pnc hosp15_pnc ///
```

```

> i.religion i.v024 i.seasons i.tvradio i.moneyfortreat i.age i.education i.employment
i.wealthrural ///
> i.birthnum i.nsize i.nsex
(running logit on estimation sample)

```

Survey: Logistic regression

```

Number of strata = 28
Number of PSUs = 677
Number of obs = 10,930
Population size = 11,369.917
Subpop. no. obs = 664
Subpop. size = 770.591103
Design df = 649
F( 33, 617) = 1.00
Prob > F = 0.4688

```

| binarypnc7         | Coef.     | Linearized Std. Err. | t     | P> t  | [95% Conf. Interval] |          |
|--------------------|-----------|----------------------|-------|-------|----------------------|----------|
| clinic5_pnc        | .2440603  | .5101461             | 0.48  | 0.633 | -.7576759            | 1.245796 |
| hc5_pnc            | .3724995  | .2353896             | 1.58  | 0.114 | -.0897177            | .8347167 |
| hosp5_pnc          | .6846773  | .4711668             | 1.45  | 0.147 | -.2405181            | 1.609873 |
| clinic10_pnc       | .1950144  | .2300091             | 0.85  | 0.397 | -.2566374            | .6466662 |
| hc10_pnc           | .2251459  | .2219502             | 1.01  | 0.311 | -.2106812            | .6609731 |
| hosp10_pnc         | .3799208  | .2321174             | 1.64  | 0.102 | -.075871             | .8357125 |
| clinic15_pnc       | .0184957  | .24624               | 0.08  | 0.940 | -.4650275            | .5020188 |
| hc15_pnc           | -.1153795 | .2870314             | -0.40 | 0.688 | -.6790018            | .4482429 |
| hosp15_pnc         | .0610503  | .221403              | 0.28  | 0.783 | -.3737023            | .4958029 |
| religion           |           |                      |       |       |                      |          |
| other christian    | .0815087  | .3226888             | 0.25  | 0.801 | -.5521315            | .7151489 |
| muslim/no religion | -.0291353 | .423732              | -0.07 | 0.945 | -.8611864            | .8029158 |
| v024               |           |                      |       |       |                      |          |
| central region     | -.2804139 | .3482708             | -0.81 | 0.421 | -.9642875            | .4034597 |
| southern region    | -.5468548 | .3541319             | -1.54 | 0.123 | -1.242237            | .1485279 |
| seasons            |           |                      |       |       |                      |          |
| winter-dry season  | -.2276981 | .3168302             | -0.72 | 0.473 | -.8498342            | .394438  |
| hot-dry season     | -.2747952 | .2860364             | -0.96 | 0.337 | -.8364636            | .2868733 |
| 1.tvradio          | .0388962  | .2398108             | 0.16  | 0.871 | -.4320026            | .509795  |
| 1.moneyfortreat    | .2288167  | .2253334             | 1.02  | 0.310 | -.2136538            | .6712872 |
| age                |           |                      |       |       |                      |          |
| 25-34              | .3605479  | .3498309             | 1.03  | 0.303 | -.3263892            | 1.047485 |
| 35-49              | .3117922  | .4228843             | 0.74  | 0.461 | -.5185944            | 1.142179 |
| education          |           |                      |       |       |                      |          |
| primary            | .061771   | .3345601             | 0.18  | 0.854 | -.5951799            | .7187219 |
| secondary          | -1.459007 | .9081137             | -1.61 | 0.109 | -3.242202            | .324189  |
| 1.employment       | .2581898  | .2629074             | 0.98  | 0.326 | -.2580621            | .7744417 |
| wealthrural        |           |                      |       |       |                      |          |



|                   |           |          |       |       |           |           |
|-------------------|-----------|----------|-------|-------|-----------|-----------|
| southern region   | -.1050912 | .0712816 | -1.47 | 0.141 | -.2450616 | .0348791  |
| seasons           |           |          |       |       |           |           |
| winter-dry season | -.042557  | .0583988 | -0.73 | 0.466 | -.1572304 | .0721163  |
| hot-dry season    | -.0508736 | .051538  | -0.99 | 0.324 | -.152075  | .0503279  |
| 1.tvradio         | .0072412  | .0447568 | 0.16  | 0.872 | -.0806444 | .0951267  |
| 1.moneyfortreat   | .0422259  | .0413739 | 1.02  | 0.308 | -.039017  | .1234688  |
| age               |           |          |       |       |           |           |
| 25-34             | .0658161  | .0631116 | 1.04  | 0.297 | -.0581114 | .1897436  |
| 35-49             | .056373   | .0772666 | 0.73  | 0.466 | -.0953497 | .2080957  |
| education         |           |          |       |       |           |           |
| primary           | .0118427  | .0646502 | 0.18  | 0.855 | -.115106  | .1387914  |
| secondary         | -.1925346 | .0753518 | -2.56 | 0.011 | -.3404973 | -.0445718 |
| 1.employment      | .0470784  | .0468576 | 1.00  | 0.315 | -.0449323 | .1390891  |
| wealthrural       |           |          |       |       |           |           |
| 2                 | .1214012  | .0565197 | 2.15  | 0.032 | .0104176  | .2323849  |
| 3                 | .1209385  | .0611421 | 1.98  | 0.048 | .0008784  | .2409986  |
| 4                 | .1189006  | .0615573 | 1.93  | 0.054 | -.001975  | .2397762  |
| 5                 | .0678605  | .0697002 | 0.97  | 0.331 | -.0690046 | .2047256  |
| birthnum          |           |          |       |       |           |           |
| 2-3               | -.077358  | .0874767 | -0.88 | 0.377 | -.2491294 | .0944134  |
| 4+                | -.1373767 | .1010995 | -1.36 | 0.175 | -.3358983 | .0611448  |
| nsize             |           |          |       |       |           |           |
| 2                 | -.1142897 | .0886015 | -1.29 | 0.198 | -.28827   | .0596906  |
| 3                 | -.1322783 | .0895722 | -1.48 | 0.140 | -.3081646 | .043608   |
| 4                 | -.1159939 | .0924745 | -1.25 | 0.210 | -.2975793 | .0655915  |
| 5                 | -.1175348 | .1207227 | -0.97 | 0.331 | -.3545891 | .1195195  |
| nsex              |           |          |       |       |           |           |
| female            | .025013   | .0482086 | 0.52  | 0.604 | -.0696507 | .1196768  |

Note: dy/dx for factor levels is the discrete change from the base level.

```

.
. /*****
> Facility
> Delivery
> Only
> *****/
.
. ****Survey weights
. gen weight = v005/1000000
(1 missing value generated)

. svyset [pweight=weight], psu(v021) strata(v022)

      pweight: weight
      VCE: linearized

```

Single unit: missing  
 Strata 1: v022  
 SU 1: v021  
 FPC 1: <zero>

```
. ***Analysis commands
. svy, subpop(del if residence == 1):logit specialmpnc7 clinic5_pnc hc5_pnc hosp5_pnc ///
> clinic10_pnc hc10_pnc hosp10_pnc ///
> clinic15_pnc hc15_pnc hosp15_pnc ///
> i.religion i.mhealthcheckb4 i.v024 i.csect i.seasons i.tvradio i.moneyfortreat i.age
i.education i.employment i.wealt
> hrural ///
> i.birthnum i.nsize i.nsex
(running logit on estimation sample)
```

Survey: Logistic regression

|                  |   |     |                 |   |            |
|------------------|---|-----|-----------------|---|------------|
| Number of strata | = | 28  | Number of obs   | = | 10,774     |
| Number of PSUs   | = | 677 | Population size | = | 11,193.203 |
|                  |   |     | Subpop. no. obs | = | 10,083     |
|                  |   |     | Subpop. size    | = | 10,394.781 |
|                  |   |     | Design df       | = | 649        |
|                  |   |     | F( 35, 615)     | = | 8.38       |
|                  |   |     | Prob > F        | = | 0.0000     |

| specialmpnc7       | Coef.     | Linearized Std. Err. | t     | P> t  | [95% Conf. Interval] |           |
|--------------------|-----------|----------------------|-------|-------|----------------------|-----------|
| clinic5_pnc        | -.1713843 | .2521968             | -0.68 | 0.497 | -.6666045            | .3238358  |
| hc5_pnc            | .2877873  | .1240143             | 2.32  | 0.021 | .0442695             | .531305   |
| hosp5_pnc          | .2992524  | .1804548             | 1.66  | 0.098 | -.0550932            | .6535981  |
| clinic10_pnc       | -.0002366 | .1540629             | -0.00 | 0.999 | -.3027585            | .3022854  |
| hc10_pnc           | .4077845  | .1317325             | 3.10  | 0.002 | .1491112             | .6664579  |
| hosp10_pnc         | -.3143191 | .1357553             | -2.32 | 0.021 | -.5808917            | -.0477466 |
| clinic15_pnc       | -.003234  | .1436078             | -0.02 | 0.982 | -.285226             | .2787581  |
| hc15_pnc           | .0831673  | .1562004             | 0.53  | 0.595 | -.2235518            | .3898864  |
| hosp15_pnc         | -.0333368 | .1334811             | -0.25 | 0.803 | -.2954436            | .2287701  |
| religion           |           |                      |       |       |                      |           |
| other christian    | -.1521579 | .0986293             | -1.54 | 0.123 | -.3458289            | .0415131  |
| muslim/no religion | -.3150643 | .1525993             | -2.06 | 0.039 | -.6147123            | -.0154164 |
| 1.mhealthcheckb4   | 1.167813  | .0812546             | 14.37 | 0.000 | 1.008259             | 1.327367  |
| v024               |           |                      |       |       |                      |           |
| central region     | -.6765987 | .1658213             | -4.08 | 0.000 | -1.00221             | -.3509877 |
| southern region    | -.3003476 | .1605883             | -1.87 | 0.062 | -.615683             | .0149878  |
| 1.csect            | .0679381  | .1324842             | 0.51  | 0.608 | -.1922113            | .3280875  |
| seasons            |           |                      |       |       |                      |           |
| winter-dry season  | -.0302841 | .0764426             | -0.40 | 0.692 | -.1803887            | .1198206  |
| hot-dry season     | .0690617  | .0956194             | 0.72  | 0.470 | -.118699             | .2568224  |



|                    |           |          |       |       |           |           |
|--------------------|-----------|----------|-------|-------|-----------|-----------|
| clinic5_pnc        | -.0192471 | .028343  | -0.68 | 0.497 | -.0749021 | .0364078  |
| hc5_pnc            | .0323196  | .0138848 | 2.33  | 0.020 | .0050551  | .0595842  |
| hosp5_pnc          | .0336072  | .0204014 | 1.65  | 0.100 | -.0064535 | .073668   |
| clinic10_pnc       | -.0000266 | .0173019 | -0.00 | 0.999 | -.034001  | .0339479  |
| hc10_pnc           | .0457958  | .0150406 | 3.04  | 0.002 | .0162618  | .0753298  |
| hosp10_pnc         | -.0352993 | .015333  | -2.30 | 0.022 | -.0654076 | -.0051909 |
| clinic15_pnc       | -.0003632 | .0161292 | -0.02 | 0.982 | -.0320348 | .0313084  |
| hc15_pnc           | .00934    | .0175674 | 0.53  | 0.595 | -.0251558 | .0438358  |
| hosp15_pnc         | -.0037438 | .014966  | -0.25 | 0.803 | -.0331314 | .0256437  |
| religion           |           |          |       |       |           |           |
| other christian    | -.0179044 | .0119663 | -1.50 | 0.135 | -.0414017 | .0055928  |
| muslim/no religion | -.0352706 | .0168611 | -2.09 | 0.037 | -.0683795 | -.0021617 |
| 1.mhealthcheckb4   | .130677   | .009676  | 13.51 | 0.000 | .111677   | .149677   |
| v024               |           |          |       |       |           |           |
| central region     | -.0799752 | .0207653 | -3.85 | 0.000 | -.1207504 | -.0391999 |
| southern region    | -.0396011 | .0219927 | -1.80 | 0.072 | -.0827866 | .0035844  |
| 1.csect            | .0077714  | .0153973 | 0.50  | 0.614 | -.022463  | .0380059  |
| seasons            |           |          |       |       |           |           |
| winter-dry season  | -.0033614 | .0084798 | -0.40 | 0.692 | -.0200125 | .0132897  |
| hot-dry season     | .0079066  | .0109906 | 0.72  | 0.472 | -.0136749 | .0294881  |
| 1.tvradio          | -.0036004 | .0095702 | -0.38 | 0.707 | -.0223926 | .0151918  |
| 1.moneyfortreat    | .0081266  | .0098056 | 0.83  | 0.408 | -.011128  | .0273811  |
| age                |           |          |       |       |           |           |
| 25-34              | .0073065  | .0112183 | 0.65  | 0.515 | -.0147221 | .0293352  |
| 35-49              | .0194492  | .015073  | 1.29  | 0.197 | -.0101486 | .0490469  |
| education          |           |          |       |       |           |           |
| primary            | .0118626  | .0107865 | 1.10  | 0.272 | -.0093179 | .0330432  |
| secondary          | .0456694  | .0230566 | 1.98  | 0.048 | .0003948  | .0909441  |
| 1.employment       | .0438846  | .0093979 | 4.67  | 0.000 | .0254306  | .0623386  |
| wealthrural        |           |          |       |       |           |           |
| 2                  | .0152595  | .0117217 | 1.30  | 0.193 | -.0077575 | .0382765  |
| 3                  | .0063066  | .0113466 | 0.56  | 0.579 | -.0159739 | .0285871  |
| 4                  | .0150795  | .0134122 | 1.12  | 0.261 | -.0112571 | .0414161  |
| 5                  | .020778   | .0159108 | 1.31  | 0.192 | -.0104649 | .0520208  |
| birthnum           |           |          |       |       |           |           |
| 2-3                | .0249585  | .0119408 | 2.09  | 0.037 | .0015113  | .0484057  |
| 4+                 | .0122931  | .0148323 | 0.83  | 0.408 | -.016832  | .0414182  |
| nsize              |           |          |       |       |           |           |
| 2                  | -.0044108 | .017532  | -0.25 | 0.801 | -.038837  | .0300155  |
| 3                  | -.0161621 | .0155438 | -1.04 | 0.299 | -.0466844 | .0143602  |
| 4                  | -.0083325 | .0183818 | -0.45 | 0.650 | -.0444275 | .0277625  |
| 5                  | -.062973  | .0193413 | -3.26 | 0.001 | -.1009521 | -.024994  |



|        |  |          |         |      |       |          |          |
|--------|--|----------|---------|------|-------|----------|----------|
| nsex   |  |          |         |      |       |          |          |
| female |  | .0020704 | .007877 | 0.26 | 0.793 | -.013397 | .0175378 |

-----  
Note: dy/dx for factor levels is the discrete change from the base level.

```
.
. svy, subpop(del if residence == 1):logit specialpnc7 clinic5_pnc hc5_pnc hosp5_pnc ///
> clinic10_pnc hc10_pnc hosp10_pnc ///
> clinic15_pnc hc15_pnc hosp15_pnc ///
> i.religion i.newborncheckb4 i.v024 i.csect i.seasons i.tvradio i.moneyfortreat i.age
i.education i.employment i.wealt
> hrural ///
> i.birthnum i.nsize i.nsex
(running logit on estimation sample)
```

Survey: Logistic regression

|                  |   |     |                 |   |            |
|------------------|---|-----|-----------------|---|------------|
| Number of strata | = | 28  | Number of obs   | = | 10,720     |
| Number of PSUs   | = | 677 | Population size | = | 11,143.466 |
|                  |   |     | Subpop. no. obs | = | 10,029     |
|                  |   |     | Subpop. size    | = | 10,345.044 |
|                  |   |     | Design df       | = | 649        |
|                  |   |     | F( 35, 615)     | = | 6.52       |
|                  |   |     | Prob > F        | = | 0.0000     |

| specialpnc7        | Coef.     | Linearized Std. Err. | t     | P> t  | [95% Conf. Interval] |           |
|--------------------|-----------|----------------------|-------|-------|----------------------|-----------|
| clinic5_pnc        | -.7972276 | .2244289             | -3.55 | 0.000 | -1.237922            | -.3565332 |
| hc5_pnc            | .0694486  | .0909467             | 0.76  | 0.445 | -.1091367            | .2480338  |
| hosp5_pnc          | .1815618  | .1307986             | 1.39  | 0.166 | -.0752778            | .4384013  |
| clinic10_pnc       | -.2507205 | .1271165             | -1.97 | 0.049 | -.5003297            | -.0011113 |
| hc10_pnc           | .3851476  | .0996665             | 3.86  | 0.000 | .1894399             | .5808553  |
| hosp10_pnc         | -.0651567 | .0937966             | -0.69 | 0.488 | -.2493381            | .1190248  |
| clinic15_pnc       | .1727465  | .1162374             | 1.49  | 0.138 | -.0555004            | .4009933  |
| hc15_pnc           | .1280178  | .1199678             | 1.07  | 0.286 | -.1075542            | .3635898  |
| hosp15_pnc         | -.0715044 | .0911826             | -0.78 | 0.433 | -.250553             | .1075441  |
| religion           |           |                      |       |       |                      |           |
| other christian    | -.0870707 | .0807371             | -1.08 | 0.281 | -.2456081            | .0714667  |
| muslim/no religion | -.1483652 | .1354283             | -1.10 | 0.274 | -.4142959            | .1175654  |
| 1.newborncheckb4   | .5879751  | .0758647             | 7.75  | 0.000 | .4390052             | .736945   |
| v024               |           |                      |       |       |                      |           |
| central region     | -.8264429 | .1231042             | -6.71 | 0.000 | -1.068174            | -.5847122 |
| southern region    | -.6545487 | .1256078             | -5.21 | 0.000 | -.9011954            | -.4079019 |
| 1.csect            | -.3920524 | .13414               | -2.92 | 0.004 | -.6554532            | -.1286515 |
| seasons            |           |                      |       |       |                      |           |
| winter-dry season  | -.0018992 | .0630699             | -0.03 | 0.976 | -.1257449            | .1219466  |
| hot-dry season     | -.0497317 | .0831904             | -0.60 | 0.550 | -.2130866            | .1136232  |



|                    |           |          |       |       |           |           |
|--------------------|-----------|----------|-------|-------|-----------|-----------|
| hc5_pnc            | .0120453  | .0157414 | 0.77  | 0.444 | -.0188649 | .0429555  |
| hosp5_pnc          | .0314904  | .0227019 | 1.39  | 0.166 | -.0130877 | .0760684  |
| clinic10_pnc       | -.0434853 | .0219244 | -1.98 | 0.048 | -.0865367 | -.000434  |
| hc10_pnc           | .0668006  | .0173388 | 3.85  | 0.000 | .0327538  | .1008474  |
| hosp10_pnc         | -.0113009 | .016294  | -0.69 | 0.488 | -.0432963 | .0206945  |
| clinic15_pnc       | .0299614  | .0201963 | 1.48  | 0.138 | -.0096966 | .0696194  |
| hc15_pnc           | .0222036  | .0208396 | 1.07  | 0.287 | -.0187176 | .0631248  |
| hosp15_pnc         | -.0124018 | .0158295 | -0.78 | 0.434 | -.0434851 | .0186814  |
| religion           |           |          |       |       |           |           |
| other christian    | -.0153791 | .0144532 | -1.06 | 0.288 | -.0437598 | .0130016  |
| muslim/no religion | -.0258356 | .0233601 | -1.11 | 0.269 | -.0717061 | .020035   |
| 1.newborncheckb4   | .0975287  | .0120471 | 8.10  | 0.000 | .0738726  | .1211847  |
| v024               |           |          |       |       |           |           |
| central region     | -.1590754 | .0248363 | -6.40 | 0.000 | -.2078446 | -.1103062 |
| southern region    | -.1303944 | .0262167 | -4.97 | 0.000 | -.1818742 | -.0789147 |
| 1.csect            | -.0623722 | .0195298 | -3.19 | 0.001 | -.1007214 | -.024023  |
| seasons            |           |          |       |       |           |           |
| winter-dry season  | -.0003308 | .0109875 | -0.03 | 0.976 | -.0219062 | .0212445  |
| hot-dry season     | -.0085666 | .0142961 | -0.60 | 0.549 | -.0366389 | .0195057  |
| 1.tvradio          | -.0134992 | .0108907 | -1.24 | 0.216 | -.0348845 | .0078861  |
| 1.moneyfortreat    | .0017591  | .011466  | 0.15  | 0.878 | -.020756  | .0242741  |
| age                |           |          |       |       |           |           |
| 25-34              | -.0220782 | .015651  | -1.41 | 0.159 | -.0528109 | .0086544  |
| 35-49              | -.0402362 | .020195  | -1.99 | 0.047 | -.0798916 | -.0005809 |
| education          |           |          |       |       |           |           |
| primary            | .0196743  | .0139295 | 1.41  | 0.158 | -.0076779 | .0470266  |
| secondary          | .0380163  | .026941  | 1.41  | 0.159 | -.0148858 | .0909184  |
| 1.employment       | .067877   | .0115029 | 5.90  | 0.000 | .0452897  | .0904644  |
| wealthrural        |           |          |       |       |           |           |
| 2                  | .0174049  | .016749  | 1.04  | 0.299 | -.0154839 | .0502938  |
| 3                  | .0304523  | .0172714 | 1.76  | 0.078 | -.0034623 | .0643668  |
| 4                  | .037664   | .0174288 | 2.16  | 0.031 | .0034404  | .0718876  |
| 5                  | .0529382  | .0189081 | 2.80  | 0.005 | .0158097  | .0900667  |
| birthnum           |           |          |       |       |           |           |
| 2-3                | .0350953  | .0151343 | 2.32  | 0.021 | .0053772  | .0648134  |
| 4+                 | .0502606  | .0190068 | 2.64  | 0.008 | .0129384  | .0875827  |
| nsize              |           |          |       |       |           |           |
| 2                  | .0297394  | .0195669 | 1.52  | 0.129 | -.0086827 | .0681616  |
| 3                  | .0107398  | .0184608 | 0.58  | 0.561 | -.0255104 | .0469899  |
| 4                  | .0025887  | .0217606 | 0.12  | 0.905 | -.040141  | .0453184  |
| 5                  | -.0327587 | .0257407 | -1.27 | 0.204 | -.0833039 | .0177864  |
| nsex               |           |          |       |       |           |           |

female | -.013678 .0090093 -1.52 0.129 -.0313688 .0040129

-----  
 Note: dy/dx for factor levels is the discrete change from the base level.

```
.
. ***Appendix analysis
. svy, subpop(del if residence == 1):logit binarympnc1 clinic5_pnc hc5_pnc hosp5_pnc ///
> clinic10_pnc hc10_pnc hosp10_pnc ///
> clinic15_pnc hc15_pnc hosp15_pnc ///
> i.religion i.mhealthcheckb4 i.v024 i.csect i.seasons i.tvradio i.moneyfortreat i.age
i.education i.employment i.wealt
> hrural ///
> i.birthnum i.nsize i.nsex
(running logit on estimation sample)
```

Survey: Logistic regression

|                  |   |     |                 |   |            |
|------------------|---|-----|-----------------|---|------------|
| Number of strata | = | 28  | Number of obs   | = | 10,774     |
| Number of PSUs   | = | 677 | Population size | = | 11,193.203 |
|                  |   |     | Subpop. no. obs | = | 10,083     |
|                  |   |     | Subpop. size    | = | 10,394.781 |
|                  |   |     | Design df       | = | 649        |
|                  |   |     | F( 35, 615)     | = | 3.62       |
|                  |   |     | Prob > F        | = | 0.0000     |

| binarympnc1        | Coef.     | Linearized Std. Err. | t     | P> t  | [95% Conf. Interval] |           |
|--------------------|-----------|----------------------|-------|-------|----------------------|-----------|
| clinic5_pnc        | .6902585  | .4632379             | 1.49  | 0.137 | -.2193675            | 1.599884  |
| hc5_pnc            | -.1427565 | .2071828             | -0.69 | 0.491 | -.5495861            | .264073   |
| hosp5_pnc          | -.8636086 | .3499622             | -2.47 | 0.014 | -1.550804            | -.1764138 |
| clinic10_pnc       | .1737064  | .2927978             | 0.59  | 0.553 | -.4012389            | .7486517  |
| hc10_pnc           | .0075948  | .2364449             | 0.03  | 0.974 | -.4566945            | .4718842  |
| hosp10_pnc         | -.1110662 | .2197209             | -0.51 | 0.613 | -.5425158            | .3203834  |
| clinic15_pnc       | -.4459529 | .2342792             | -1.90 | 0.057 | -.9059897            | .0140839  |
| hc15_pnc           | -.2770907 | .2328956             | -1.19 | 0.235 | -.7344105            | .1802292  |
| hosp15_pnc         | -.4099068 | .2138935             | -1.92 | 0.056 | -.8299137            | .0101001  |
| religion           |           |                      |       |       |                      |           |
| other christian    | .1252275  | .2164145             | 0.58  | 0.563 | -.2997296            | .5501845  |
| muslim/no religion | -.9873748 | .3815415             | -2.59 | 0.010 | -1.73658             | -.2381701 |
| 1.mhealthcheckb4   | 1.156496  | .1830431             | 6.32  | 0.000 | .7970683             | 1.515925  |
| v024               |           |                      |       |       |                      |           |
| central region     | -1.267796 | .2990112             | -4.24 | 0.000 | -1.854942            | -.6806496 |
| southern region    | -.1300683 | .2731065             | -0.48 | 0.634 | -.6663472            | .4062106  |
| 1.csect            | .1728796  | .3299634             | 0.52  | 0.601 | -.475045             | .8208042  |
| seasons            |           |                      |       |       |                      |           |
| winter-dry season  | -.4740604 | .1814635             | -2.61 | 0.009 | -.8303869            | -.1177339 |
| hot-dry season     | -.3086193 | .2202082             | -1.40 | 0.162 | -.7410259            | .1237872  |



|                    |           |          |       |       |           |           |
|--------------------|-----------|----------|-------|-------|-----------|-----------|
| hc5_pnc            | -.0028674 | .0041612 | -0.69 | 0.491 | -.0110385 | .0053036  |
| hosp5_pnc          | -.0173466 | .0072646 | -2.39 | 0.017 | -.0316116 | -.0030815 |
| clinic10_pnc       | .0034891  | .0059298 | 0.59  | 0.556 | -.0081549 | .015133   |
| hc10_pnc           | .0001526  | .0047511 | 0.03  | 0.974 | -.0091769 | .009482   |
| hosp10_pnc         | -.0022309 | .00444   | -0.50 | 0.616 | -.0109494 | .0064876  |
| clinic15_pnc       | -.0089575 | .0049599 | -1.81 | 0.071 | -.0186969 | .0007819  |
| hc15_pnc           | -.0055657 | .0046706 | -1.19 | 0.234 | -.0147369 | .0036056  |
| hosp15_pnc         | -.0082335 | .0043514 | -1.89 | 0.059 | -.0167779 | .000311   |
| religion           |           |          |       |       |           |           |
| other christian    | .0027593  | .0045821 | 0.60  | 0.547 | -.0062382 | .0117568  |
| muslim/no religion | -.0134087 | .0052703 | -2.54 | 0.011 | -.0237576 | -.0030598 |
| 1.mhealthcheckb4   | .0221677  | .0037591 | 5.90  | 0.000 | .0147863  | .0295492  |
| v024               |           |          |       |       |           |           |
| central region     | -.0232597 | .0074043 | -3.14 | 0.002 | -.0377989 | -.0087204 |
| southern region    | -.0038151 | .0082522 | -0.46 | 0.644 | -.0200194 | .0123892  |
| 1.csect            | .0037169  | .0076257 | 0.49  | 0.626 | -.0112571 | .0186909  |
| seasons            |           |          |       |       |           |           |
| winter-dry season  | -.0092688 | .0034888 | -2.66 | 0.008 | -.0161194 | -.0024182 |
| hot-dry season     | -.006481  | .0044427 | -1.46 | 0.145 | -.0152048 | .0022428  |
| 1.tvradio          | .0062964  | .0039514 | 1.59  | 0.112 | -.0014627 | .0140556  |
| 1.moneyfortreat    | .0058825  | .0035745 | 1.65  | 0.100 | -.0011364 | .0129014  |
| age                |           |          |       |       |           |           |
| 25-34              | -.0017803 | .0043474 | -0.41 | 0.682 | -.010317  | .0067564  |
| 35-49              | -.0024486 | .0061335 | -0.40 | 0.690 | -.0144925 | .0095953  |
| education          |           |          |       |       |           |           |
| primary            | -.0021465 | .0036468 | -0.59 | 0.556 | -.0093075 | .0050146  |
| secondary          | -.0010015 | .0107415 | -0.09 | 0.926 | -.0220938 | .0200908  |
| 1.employment       | -.0027087 | .0034063 | -0.80 | 0.427 | -.0093974 | .00398    |
| wealthrural        |           |          |       |       |           |           |
| 2                  | .0049418  | .0051898 | 0.95  | 0.341 | -.0052489 | .0151326  |
| 3                  | .0014009  | .0050998 | 0.27  | 0.784 | -.0086132 | .011415   |
| 4                  | -.0040219 | .0051773 | -0.78 | 0.438 | -.0141882 | .0061444  |
| 5                  | -.0005622 | .0059831 | -0.09 | 0.925 | -.0123108 | .0111864  |
| birthnum           |           |          |       |       |           |           |
| 2-3                | .0006535  | .0045356 | 0.14  | 0.885 | -.0082528 | .0095598  |
| 4+                 | -.0011257 | .0056756 | -0.20 | 0.843 | -.0122705 | .0100192  |
| nsize              |           |          |       |       |           |           |
| 2                  | -.0008052 | .0061746 | -0.13 | 0.896 | -.0129297 | .0113194  |
| 3                  | .0043828  | .006072  | 0.72  | 0.471 | -.0075404 | .016306   |
| 4                  | -.000498  | .0074128 | -0.07 | 0.946 | -.0150541 | .014058   |
| 5                  | .0023097  | .0095528 | 0.24  | 0.809 | -.0164484 | .0210678  |
| nsex               |           |          |       |       |           |           |

female | .0015027 .0030808 0.49 0.626 -.0045468 .0075522

-----  
 Note: dy/dx for factor levels is the discrete change from the base level.

```
. svy, subpop(del if residence == 1):logit binarypnc1 clinic5_pnc hc5_pnc hosp5_pnc ///
> clinic10_pnc hc10_pnc hosp10_pnc ///
> clinic15_pnc hc15_pnc hosp15_pnc ///
> i.religion i.newborncheckb4 i.v024 i.csect i.seasons i.tvradio i.moneyfortreat i.age
i.education i.employment i.wealt
> hrural ///
> i.birthnum i.nsize i.nsex
(running logit on estimation sample)
```

Survey: Logistic regression

|                  |   |     |                 |   |            |
|------------------|---|-----|-----------------|---|------------|
| Number of strata | = | 28  | Number of obs   | = | 10,720     |
| Number of PSUs   | = | 677 | Population size | = | 11,143.466 |
|                  |   |     | Subpop. no. obs | = | 10,029     |
|                  |   |     | Subpop. size    | = | 10,345.044 |
|                  |   |     | Design df       | = | 649        |
|                  |   |     | F( 35, 615)     | = | 2.26       |
|                  |   |     | Prob > F        | = | 0.0001     |

| binarypnc1         | Coef.     | Linearized Std. Err. | t     | P> t  | [95% Conf. Interval] |           |
|--------------------|-----------|----------------------|-------|-------|----------------------|-----------|
| clinic5_pnc        | .1273111  | .4504968             | 0.28  | 0.778 | -.7572961            | 1.011918  |
| hc5_pnc            | -.0981596 | .2094017             | -0.47 | 0.639 | -.5093462            | .313027   |
| hosp5_pnc          | -.4227043 | .3100487             | -1.36 | 0.173 | -1.031524            | .1861154  |
| clinic10_pnc       | .3026479  | .2660244             | 1.14  | 0.256 | -.2197245            | .8250203  |
| hc10_pnc           | .0001427  | .2240476             | 0.00  | 0.999 | -.439803             | .4400885  |
| hosp10_pnc         | -.2390088 | .2111028             | -1.13 | 0.258 | -.6535357            | .1755181  |
| clinic15_pnc       | -.2210003 | .2337769             | -0.95 | 0.345 | -.6800506            | .2380501  |
| hc15_pnc           | .0043599  | .2748253             | 0.02  | 0.987 | -.5352942            | .544014   |
| hosp15_pnc         | -.4983598 | .2125228             | -2.34 | 0.019 | -.9156751            | -.0810445 |
| religion           |           |                      |       |       |                      |           |
| other christian    | -.0224034 | .240471              | -0.09 | 0.926 | -.4945985            | .4497917  |
| muslim/no religion | -.9726906 | .3827261             | -2.54 | 0.011 | -1.724221            | -.2211597 |
| 1.newborncheckb4   | .8862694  | .2173108             | 4.08  | 0.000 | .4595522             | 1.312987  |
| v024               |           |                      |       |       |                      |           |
| central region     | -.1434647 | .3397785             | -0.42 | 0.673 | -.8106626            | .5237333  |
| southern region    | .7502831  | .317386              | 2.36  | 0.018 | .1270558             | 1.37351   |
| 1.csect            | -.8385553 | .5223252             | -1.61 | 0.109 | -1.864207            | .1870962  |
| seasons            |           |                      |       |       |                      |           |
| winter-dry season  | -.0510674 | .1684633             | -0.30 | 0.762 | -.3818662            | .2797315  |
| hot-dry season     | -.3306809 | .2212887             | -1.49 | 0.136 | -.7652092            | .1038474  |
| 1.tvradio          | .5376109  | .1647877             | 3.26  | 0.001 | .2140295             | .8611923  |

|                 |           |          |       |       |           |           |
|-----------------|-----------|----------|-------|-------|-----------|-----------|
| 1.moneyfortreat | .2377566  | .1825438 | 1.30  | 0.193 | -.1206912 | .5962043  |
| age             |           |          |       |       |           |           |
| 25-34           | -.0750642 | .245106  | -0.31 | 0.760 | -.5563607 | .4062323  |
| 35-49           | -.0073627 | .3122698 | -0.02 | 0.981 | -.6205438 | .6058185  |
| education       |           |          |       |       |           |           |
| primary         | -.2246152 | .2168105 | -1.04 | 0.301 | -.65035   | .2011195  |
| secondary       | -.5194271 | .4823611 | -1.08 | 0.282 | -1.466604 | .4277497  |
| 1.employment    | .2425661  | .1870795 | 1.30  | 0.195 | -.1247881 | .6099203  |
| wealthrural     |           |          |       |       |           |           |
| 2               | .1009932  | .2310206 | 0.44  | 0.662 | -.3526449 | .5546313  |
| 3               | -.0798653 | .2300369 | -0.35 | 0.729 | -.5315717 | .3718411  |
| 4               | .0595342  | .2551008 | 0.23  | 0.816 | -.4413883 | .5604568  |
| 5               | -.5595173 | .2893864 | -1.93 | 0.054 | -1.127764 | .0087293  |
| birthnum        |           |          |       |       |           |           |
| 2-3             | -.0201103 | .2350157 | -0.09 | 0.932 | -.4815932 | .4413726  |
| 4+              | -.2064249 | .2945802 | -0.70 | 0.484 | -.7848702 | .3720203  |
| nsize           |           |          |       |       |           |           |
| 2               | .2131295  | .3146183 | 0.68  | 0.498 | -.4046632 | .8309222  |
| 3               | .0938037  | .2929898 | 0.32  | 0.749 | -.4815186 | .669126   |
| 4               | .3092759  | .3369274 | 0.92  | 0.359 | -.3523235 | .9708753  |
| 5               | -.0210719 | .4610583 | -0.05 | 0.964 | -.926418  | .8842742  |
| nsex            |           |          |       |       |           |           |
| female          | -.0918444 | .1525318 | -0.60 | 0.547 | -.3913598 | .207671   |
| _cons           | -4.881232 | .6187807 | -7.89 | 0.000 | -6.096286 | -3.666178 |

Note: 28 strata omitted because they contain no subpopulation members.

. margins, dydx(\*)

Average marginal effects  
Model VCE : Linearized

Number of obs = 10,029

Expression : Pr(binarypnc1), predict()

dy/dx w.r.t. : clinic5\_pnc hc5\_pnc hosp5\_pnc clinic10\_pnc hc10\_pnc hosp10\_pnc clinic15\_pnc  
hc15\_pnc hosp15\_pnc

2.religion 3.religion 1.newborncheckb4 2.v024 3.v024 1.csect 2.seasons  
3.seasons 1.tvradio

1.moneyfortreat 2.age 3.age 2.education 3.education 1.employment

2.wealthrural 3.wealthrural

4.wealthrural 5.wealthrural 2.birthnum 3.birthnum 2.nsize 3.nsize 4.nsize  
5.nsize 1.nsex

|             | dy/dx     | Delta-method<br>Std. Err. | t     | P> t  | [95% Conf. Interval] |
|-------------|-----------|---------------------------|-------|-------|----------------------|
| clinic5_pnc | .0022669  | .0080168                  | 0.28  | 0.777 | -.0134751 .018009    |
| hc5_pnc     | -.0017479 | .0037304                  | -0.47 | 0.640 | -.0090729 .0055772   |



|                    |           |          |       |       |           |           |
|--------------------|-----------|----------|-------|-------|-----------|-----------|
| hosp5_pnc          | -.0075268 | .0055626 | -1.35 | 0.176 | -.0184496 | .0033961  |
| clinic10_pnc       | .005389   | .0048174 | 1.12  | 0.264 | -.0040706 | .0148487  |
| hc10_pnc           | 2.54e-06  | .0039895 | 0.00  | 0.999 | -.0078313 | .0078363  |
| hosp10_pnc         | -.0042558 | .0038341 | -1.11 | 0.267 | -.0117846 | .0032729  |
| clinic15_pnc       | -.0039352 | .0042139 | -0.93 | 0.351 | -.0122097 | .0043393  |
| hc15_pnc           | .0000776  | .004894  | 0.02  | 0.987 | -.0095324 | .0096877  |
| hosp15_pnc         | -.0088739 | .0038854 | -2.28 | 0.023 | -.0165034 | -.0012444 |
| religion           |           |          |       |       |           |           |
| other christian    | -.0004551 | .0049197 | -0.09 | 0.926 | -.0101155 | .0092052  |
| muslim/no religion | -.0130618 | .0053426 | -2.44 | 0.015 | -.0235527 | -.0025709 |
| 1.newborncheckb4   | .0132626  | .0029341 | 4.52  | 0.000 | .0075011  | .0190241  |
| v024               |           |          |       |       |           |           |
| central region     | -.0017412 | .0042496 | -0.41 | 0.682 | -.0100859 | .0066035  |
| southern region    | .0141958  | .0052039 | 2.73  | 0.007 | .0039772  | .0244143  |
| 1.csect            | -.0106279 | .0045656 | -2.33 | 0.020 | -.019593  | -.0016628 |
| seasons            |           |          |       |       |           |           |
| winter-dry season  | -.0009511 | .0031207 | -0.30 | 0.761 | -.0070791 | .0051768  |
| hot-dry season     | -.0054227 | .0033769 | -1.61 | 0.109 | -.0120536 | .0012083  |
| 1.tvradio          | .0101063  | .0034884 | 2.90  | 0.004 | .0032564  | .0169561  |
| 1.moneyfortreat    | .0041382  | .0031424 | 1.32  | 0.188 | -.0020324 | .0103088  |
| age                |           |          |       |       |           |           |
| 25-34              | -.0013296 | .0043747 | -0.30 | 0.761 | -.0099199 | .0072608  |
| 35-49              | -.0001346 | .0057055 | -0.02 | 0.981 | -.0113381 | .0110689  |
| education          |           |          |       |       |           |           |
| primary            | -.0038125 | .0034626 | -1.10 | 0.271 | -.0106118 | .0029868  |
| secondary          | -.0077317 | .0057359 | -1.35 | 0.178 | -.0189949 | .0035315  |
| 1.employment       | .0041182  | .003072  | 1.34  | 0.181 | -.001914  | .0101505  |
| wealthrural        |           |          |       |       |           |           |
| 2                  | .0019902  | .0045483 | 0.44  | 0.662 | -.006941  | .0109213  |
| 3                  | -.0014462 | .0041681 | -0.35 | 0.729 | -.0096307 | .0067383  |
| 4                  | .0011505  | .0049412 | 0.23  | 0.816 | -.0085522 | .0108532  |
| 5                  | -.0081693 | .0042134 | -1.94 | 0.053 | -.0164429 | .0001044  |
| birthnum           |           |          |       |       |           |           |
| 2-3                | -.0003865 | .0045297 | -0.09 | 0.932 | -.0092811 | .0085081  |
| 4+                 | -.0036422 | .0052859 | -0.69 | 0.491 | -.0140217 | .0067373  |
| nsize              |           |          |       |       |           |           |
| 2                  | .0036813  | .00523   | 0.70  | 0.482 | -.0065884 | .013951   |
| 3                  | .00153    | .0046492 | 0.33  | 0.742 | -.0075993 | .0106592  |
| 4                  | .0055974  | .0060523 | 0.92  | 0.355 | -.006287  | .0174819  |
| 5                  | -.0003255 | .007099  | -0.05 | 0.963 | -.0142652 | .0136143  |
| nsex               |           |          |       |       |           |           |
| female             | -.0016337 | .0027312 | -0.60 | 0.550 | -.0069967 | .0037293  |

-----  
Note:  $dy/dx$  for factor levels is the discrete change from the base level.

.  
end of do-file

-----  
-----
